# Supplementary material for: Macronutrients, Food Groups, and Eating Patterns in the Management of Diabetes: A systematic review of the literature, 2010
Source: PubMed Central journal article supplement — Diabetes Care. 2012 Jan 16;35(2):434–45. doi: 10.2337/dc11-2216 (PMC3263899; doi:10.2337/dc11-2216), 2012-01-16
Supplement: supp_35.2.434v112216_DC112216SupplementaryData.pdf [file supp_35.2.434v112216_DC112216SupplementaryData.pdf]

Supplementary Table 1—Comparison of study design and results

| Ref. number                                    | Author/year | Study type/duration                        | Diabetes | n‡        | Comparison summary            | Intervention detail¶ dietary variable of interest for observational studies                                                                         | Significant results**                                                                                                                                                                                                                                                                                                                                          | Comments/study limitations#                          |
|------------------------------------------------|-------------|--------------------------------------------|----------|-----------|-------------------------------|-----------------------------------------------------------------------------------------------------------------------------------------------------|----------------------------------------------------------------------------------------------------------------------------------------------------------------------------------------------------------------------------------------------------------------------------------------------------------------------------------------------------------------|------------------------------------------------------|
| <b>Carbohydrate amount: lower carbohydrate</b> |             |                                            |          |           |                               |                                                                                                                                                     |                                                                                                                                                                                                                                                                                                                                                                |                                                      |
| (10)                                           | Boden 2005  | Clinical trial, single arm/14 day          | Type 2   | 10 adults | Low-CHO diet                  | 21 g CHO/day                                                                                                                                        | A1C decreased 0.5% (P = 0.006); mean 24-h plasma glucose and insulin decreased (P = 0.002 and P = 0.039, respectively); FBG decreased from 7.5 to 6.3 mmol/L (P = 0.025). Insulin sensitivity (by euglycemic-hyperinsulinemic clamp) improved by 75%.<br>TC decreased from 4.68 to 4.24 mmol/L (P = 0.02); TG decreased from 1.84 to 1.19 mmol/L (P < 0.0001). | Metabolic-unit-type study<br>Significant weight loss |
| (11)                                           | Daly 2006   | RCT parallel, 2 arms/3 months, multicenter | Type 2   | 79 adults | Low-CHO diet vs. low-fat diet | Low-CHO diet: goal of up to 70 g CHO/day (achieved 110 g/day) vs. low-fat diet: standard advice to reduce portions and fat (achieved 169 g CHO/day) | Glycemic measures: NS<br>TC:HDL-C ratio improved in low-CHO group vs. low-fat group (-0.48 vs. -0.10, P = 0.011)                                                                                                                                                                                                                                               | 77% completion rate<br>Weight-loss study             |

Supplementary Table 1—Continued

| Ref. number | Author/year | Study type/duration           | Diabetes | n‡                                 | Comparison summary                                                                               | Intervention detail¶ dietary variable of interest for observational studies                                                                                                                                                                            | Significant results**                                                                                                                           | Comments/study limitations#                                                                                             |
|-------------|-------------|-------------------------------|----------|------------------------------------|--------------------------------------------------------------------------------------------------|--------------------------------------------------------------------------------------------------------------------------------------------------------------------------------------------------------------------------------------------------------|-------------------------------------------------------------------------------------------------------------------------------------------------|-------------------------------------------------------------------------------------------------------------------------|
| (12)        | Davis 2009  | RCT parallel, 2 arms/1 year   | Type 2   | 85 adults                          | Lower-CHO diet (Atkins type) vs. lower-fat diet (DPP type)                                       | Low-CHO diet: initial goal of 20–25 g CHO/day, increased by 5-g increments each week as participants lost weight (achieved 33.4% CHO, 43.9% fat) vs. low-fat diet: goal of 25% fat (achieved 30.8% fat, 50.1% CHO). 500 kcal/day deficit for both arms | Glycemic measures: NS<br>HDL-C increased more at 6 months in the low-CHO group (+0.16 mg/dL, P = 0.002) and increase was sustained at 12 months | Weight-loss study (both groups achieved a 3.4% weight reduction) Subjects under good control at baseline (A1C 7.4–7.5%) |
| (13)        | Dyson 2007  | RCT parallel, 2 arms/3 months | Type 2   | 12 adults with diabetes (22 total) | Low-CHO diet vs. healthy eating (Diabetes UK nutrition recommendations), calorie-restricted diet | Low-CHO diet: ≤40 g CHO/day (achieved 57 g CHO/day) vs. "healthy eating" with 500 kcal/day energy deficit (achieved 167 g CHO/day)                                                                                                                     | Glycemic measures: NS<br>CVD risk measures: NS                                                                                                  | Weight-loss study                                                                                                       |

Supplementary Table 1—Continued

| Ref. number | Author/year | Study type/duration                 | Diabetes      | n‡                                 | Comparison summary                                                    | Intervention detail¶ dietary variable of interest for observational studies                                                                                            | Significant results**                                                                                                                                                                                                                                            | Comments/study limitations#                                                                                                                                           |
|-------------|-------------|-------------------------------------|---------------|------------------------------------|-----------------------------------------------------------------------|------------------------------------------------------------------------------------------------------------------------------------------------------------------------|------------------------------------------------------------------------------------------------------------------------------------------------------------------------------------------------------------------------------------------------------------------|-----------------------------------------------------------------------------------------------------------------------------------------------------------------------|
| (14)        | Yancy 2005  | Clinical trial, single arm/16 weeks | Type 2        | 21 adults                          | Low-CHO diet                                                          | Initial CHO goal of <20 g CHO/day, increasing CHO by 5 g/day each week after some weight loss (8 subjects with adequate food records achieved 34 g CHO/day at week 16) | A1C decreased by 16% from 7.5 to 6.3% ( $P < 0.001$ )<br>TG decreased 42% from 2.69 to 1.57 mmol/L ( $P = 0.001$ )                                                                                                                                               | 75% retention rate<br>20 of the 21 participants were men<br>Weight-loss study<br>Diabetes medications were discontinued in 7 participants, reduced in 10 participants |
| (15)        | Stern 2004  | RCT parallel, 2 arms/1 year         | Mainly type 2 | 34 adults with diabetes (87 total) | Low-CHO diet vs. lower-fat (NHLBI guidelines) calorie-restricted diet | Low CHO: <30 g CHO/day (achieved 120 g CHO/day) vs. conventional weight-loss diet: restrict calorie intake by 500 calories/day with <30% fat (achieved 230 g CHO/day)  | A1C decreased more in the low CHO group with diabetes (−0.7%) vs. the calorie-restricted group with diabetes (−0.1%) after adjustment for baseline differences and weight-loss amount ( $P = 0.019$ )<br>CVD risk measures: not provided for diabetes group only | Weight-loss study<br>62% retention rate for people with diabetes<br>83% of subjects were men                                                                          |

Supplementary Table 1—Continued

| Ref. number | Author/year    | Study type/duration                 | Diabetes | n‡        | Comparison summary                            | Intervention detail¶ dietary variable of interest for observational studies                                                                                     | Significant results**                                                                                                                                      | Comments/study limitations#                                                                                                                                       |
|-------------|----------------|-------------------------------------|----------|-----------|-----------------------------------------------|-----------------------------------------------------------------------------------------------------------------------------------------------------------------|------------------------------------------------------------------------------------------------------------------------------------------------------------|-------------------------------------------------------------------------------------------------------------------------------------------------------------------|
| (16)        | Westman 2008   | RCT parallel, 2 arms/6 months       | Type 2   | 50 adults | Low-CHO diet vs. low-GI, reduced-calorie diet | Low-CHO diet: goal <20 g CHO/day (achieved 49 g ± 33 g CHO/day) vs. low-GI, reduced-calorie diet (500 kcal/day energy deficit): goal 55% CHO (achieved 44% CHO) | A1C reduced 1.5% in low-CHO diet vs. -0.5% in low-GI diet, P = 0.03<br>HDL-C increased by 5.6 mg/dL in low-CHO diet vs. no change in low-GI diet, P < 0.05 | 58% retention rate<br>Weight-loss study<br>“Low GI” not defined                                                                                                   |
| (17)        | Haimoto 2009   | Clinical trial, single arm/6 months | Type 2   | 31 adults | Lower-CHO diet                                | Lower-CHO goal: 30% CHO, 44% fat, 20% protein; achieved: 30 ± 10% CHO, 44 ± 10% fat, 20 ± 4% protein                                                            | A1C decreased from 10.9 to 7.4% (P < 0.001)<br>LDL-C decreased from 142 to 128 mg/dL (P = 0.036); HDL-C increased from 52 to 59 mg/dL (P = 0.008)          | Weight-loss study                                                                                                                                                 |
| (18)        | Miyashita 2004 | RCT parallel, 2 arms/4 weeks        | Type 2   | 22 adults | Lower-CHO diet vs. higher-CHO diet            | Lower-CHO diet: 39% CHO, 35% fat, 25% protein vs. higher-CHO diet: 62% CHO, 10% fat, 26% protein                                                                | Fasting insulin decreased 30% in lower CHO vs. 10% in higher CHO (P < 0.05)<br>HDL-C increased 15% in lower CHO vs. 0 in higher CHO (P < 0.01)             | Metabolic-unit study<br>Weight-loss study: weight declined similarly in both groups: lower CHO, 73 → 64 kg; higher CHO, 71 → 64 kg<br>Fiber similar in both diets |

Supplementary Table 1—Continued

| Ref. number | Author/year  | Study type/duration                             | Diabetes | n‡         | Comparison summary                             | Intervention detail¶ dietary variable of interest for observational studies                                                                                                                                                                                      | Significant results**                                                                                                                                                                                                | Comments/study limitations#                                                                                                                                                                                                                           |
|-------------|--------------|-------------------------------------------------|----------|------------|------------------------------------------------|------------------------------------------------------------------------------------------------------------------------------------------------------------------------------------------------------------------------------------------------------------------|----------------------------------------------------------------------------------------------------------------------------------------------------------------------------------------------------------------------|-------------------------------------------------------------------------------------------------------------------------------------------------------------------------------------------------------------------------------------------------------|
| (19)        | Wolever 2008 | RCT parallel, 3 arms/1-year multicenter study   | Type 2   | 130 adults | Higher GI vs. lower GI vs. lower CHO/high MUFA | End of study: higher GI: 46.5% CHO, 30.8% fat, 12.3% MUFA, 20.4% protein, GI = 63%, GL = 35 g vs. lower GI: 52% CHO, 26.5% fat, 10.7% MUFA, 20.6% protein, GI = 55%, GL = 133 g vs. lower CHO: 39.3% CHO, 40% fat, 18.3% MUFA, 19% protein, GI = 59%, GL = 110 g | Glycemic measures: NS HDL-C 4% lower and TG 12% higher on lower-GI diet than lower-CHO diet ( $P < 0.05$ for both); higher GI was intermediate                                                                       | Weight not controlled, but body weight not significantly different among diets Diabetes controlled by diet alone and subjects were in optimal glycemic control Key foods provided Lower-GI diet had 30% lower CRP than the higher GI ( $P = 0.0078$ ) |
| (20)        | Jönsson 2009 | RCT crossover/3 months each (no washout period) | Type 2   | 13 adults  | Traditional diabetic diet vs. Paleolithic diet | Traditional diet: higher fiber/whole grains, lower saturated fat vs. Paleolithic diet: lean meats, fish, fruit, vegetables, eggs, nuts                                                                                                                           | A1C lower, Paleolithic vs. traditional diet: 5.5 vs. 5.9% ( $P = 0.02$ ) HDL-C higher by 0.08 mmol/L, Paleolithic vs. traditional ( $P = 0.03$ ) TG lower by 0.4 mmol/L, Paleolithic vs. traditional ( $P = 0.003$ ) | 76% completion rate Weight not controlled (BMI decreased significantly, Paleolithic vs. traditional) ( $P = 0.04$ )                                                                                                                                   |

Supplementary Table 1—Continued

| Ref. number                                               | Author/year  | Study type/duration           | Diabetes | n‡        | Comparison summary                                    | Intervention detail¶ dietary variable of interest for observational studies                                                                                                                                                                                                                                                                                                                                     | Significant results**                                                       | Comments/study limitations#                                                                                                                                                                                                                                                                                                                                                                                                                                                                                                                                |
|-----------------------------------------------------------|--------------|-------------------------------|----------|-----------|-------------------------------------------------------|-----------------------------------------------------------------------------------------------------------------------------------------------------------------------------------------------------------------------------------------------------------------------------------------------------------------------------------------------------------------------------------------------------------------|-----------------------------------------------------------------------------|------------------------------------------------------------------------------------------------------------------------------------------------------------------------------------------------------------------------------------------------------------------------------------------------------------------------------------------------------------------------------------------------------------------------------------------------------------------------------------------------------------------------------------------------------------|
| <b>Carbohydrate amount: moderate to high carbohydrate</b> |              |                               |          |           |                                                       |                                                                                                                                                                                                                                                                                                                                                                                                                 |                                                                             |                                                                                                                                                                                                                                                                                                                                                                                                                                                                                                                                                            |
| (21)                                                      | Barnard 2009 | RCT parallel, 2 arms/74 weeks | Type 2   | 83 adults | Lower-fat vegan diet vs. conventional “diabetes” diet | <p>Vegan:<br/>                     CHO 75→66.3%<br/>                     Fat 10→22.3%<br/>                     SFA 5.1% achieved<br/>                     Protein 15→14.8%</p> <p>vs.<br/>                     Conventional diet:<br/>                     CHO 60–70→46.5%<br/>                     Fat 33.7% achieved<br/>                     SFA &lt;7→9.9%<br/>                     Protein 15–20→21.1%</p> | <p>Glycemic measures: NS<br/>                     CVD risk measures: NS</p> | <p>Ancillary analysis last available or observed before medication adjustment:<br/>                     A1C –0.40 and 0.01% in vegan and conventional diets, respectively (<i>P</i> = 0.03)<br/>                     TC –20.4 and –6.8 mg/dL in the vegan and conventional diet groups, respectively (<i>P</i> = 0.01)<br/>                     LDL-C –13.5 and –3.4 mg/dL in the vegan and conventional groups, respectively (<i>P</i> = 0.03)<br/>                     Weight reduction if overweight; weight controlled in some regression analyses</p> |

Supplementary Table 1—Continued

| Ref. number | Author/year    | Study type/duration                                      | Diabetes | n‡        | Comparison summary                      | Intervention detail¶ dietary variable of interest for observational studies                                                                                                                                                                      | Significant results**                          | Comments/study limitations#                                                                                                                                                                                                                                            |
|-------------|----------------|----------------------------------------------------------|----------|-----------|-----------------------------------------|--------------------------------------------------------------------------------------------------------------------------------------------------------------------------------------------------------------------------------------------------|------------------------------------------------|------------------------------------------------------------------------------------------------------------------------------------------------------------------------------------------------------------------------------------------------------------------------|
| (22)        | Gerhard 2004   | RCT crossover/6 weeks each with 6–12-week washout period | Type 2   | 11 adults | Lower-fat diet vs. higher-MUFA diet     | Lower-fat diet: CHO 65→64.7%<br>Fat 20→20.8%<br>MUFA 8.3% achieved<br><br>vs.<br>Higher-MUFA diet: CHO 45→45.1%<br>Fat 40→39.6%<br>MUFA 26→25.1%<br>Protein constant for both diets (15%)                                                        | Glycemic measures: NS<br>CVD risk measures: NS | Meals prepared in metabolic kitchen<br>Body weight decreased significantly (−1.53 kg, $P < 0.001$ ) on lower-fat diet<br><br>On both diets, subjects were provided 25% above maintenance energy requirement (mean 3,555 kcal/day) to allow self-selection for quantity |
| (23)        | Wycherley 2010 | RCT parallel, 4 arms/16 weeks                            | Type 2   | 59 adults | Standard-CHO diet vs. high-protein diet | Study has 4 groups:<br>Standard CHO: CHO 53→53.6%<br>Fat 26→22.6%<br>Protein 19→18.6%<br><br>vs.<br>High protein: CHO 43→47.4%<br>Fat 22→17.7%<br>Protein 33→32%<br>For the other 2 groups, resistance exercise training was added to each diet. | Glycemic response: NS<br>CVD risk measures: NS | Weight-loss study, with both diets energy restricted (−1,400 kcal/day for women, ~1,700 for men)<br>Key foods were supplied (50% total energy)<br>71% completion rate<br>Significant reductions in all groups for weight, A1C, FBG, TC, LDL-C, and TG                  |

Supplementary Table 1—Continued

| Ref. number | Author/year     | Study type/duration                                              | Diabetes | n‡        | Comparison summary                      | Intervention detail¶ dietary variable of interest for observational studies                                | Significant results**                                                                                                                                                                                                                                                                                                                                                                            | Comments/study limitations#                                                                                                                                                                                                                                                         |
|-------------|-----------------|------------------------------------------------------------------|----------|-----------|-----------------------------------------|------------------------------------------------------------------------------------------------------------|--------------------------------------------------------------------------------------------------------------------------------------------------------------------------------------------------------------------------------------------------------------------------------------------------------------------------------------------------------------------------------------------------|-------------------------------------------------------------------------------------------------------------------------------------------------------------------------------------------------------------------------------------------------------------------------------------|
| (24)        | Brinkworth 2004 | RCT parallel, 2 arms/52-week follow-up of a 12-week intervention | Type 2   | 38 adults | Higher protein vs. lower protein        | Higher-protein goals: 40% CHO, 30% fat, 30% protein vs. lower-protein goals: 55% CHO, 30% fat, 15% protein | Glycemic measures: NS<br>CVD risk measures: NS                                                                                                                                                                                                                                                                                                                                                   | See Parker 2002 for study of first 8 weeks<br>Weight uncontrolled<br>58% retention rate<br>HDL-C increased in both groups (17%)<br>During the 12-month follow-up, urinary urea:creatinine ratio remained stable in both groups, indicating compliance with the protein prescription |
| (25)        | Gannon 2003     | RCT crossover/5 weeks each with 2–5-week washout period          | Type 2   | 12 adults | Higher protein vs. control (higher CHO) | Higher protein: 40% CHO, 30% fat, 30% protein vs. higher CHO: 55% CHO, 30% fat, 15% protein                | A1C significantly decreased during higher-protein diet (8.1–7.3%) vs. higher-CHO diet (8.0–7.7%) ( $P < 0.05$ )<br>Mean 24-h integrated glucose area response (fasting glucose concentration as baseline) significantly decreased after the higher-protein diet vs. the higher-CHO diet ( $P < 0.02$ )<br>TG lower on higher-protein diet vs. higher-CHO diet (161 vs. 199 mg/dL ( $P = 0.03$ )) | Metabolic-unit-type study; all foods provided<br>Weight controlled                                                                                                                                                                                                                  |



Supplementary Table 1—Continued

| Ref. number | Author/year           | Study type/duration                                | Diabetes | n‡                     | Comparison summary                          | Intervention detail¶ dietary variable of interest for observational studies                                                                    | Significant results**                                                                                                                                                                                                                                                                                                     | Comments/study limitations#                                                                                                                                                                                                                                                |
|-------------|-----------------------|----------------------------------------------------|----------|------------------------|---------------------------------------------|------------------------------------------------------------------------------------------------------------------------------------------------|---------------------------------------------------------------------------------------------------------------------------------------------------------------------------------------------------------------------------------------------------------------------------------------------------------------------------|----------------------------------------------------------------------------------------------------------------------------------------------------------------------------------------------------------------------------------------------------------------------------|
| (26)        | Rodriguez-Villar 2004 | RCT crossover/6 weeks each, with no washout period | Type 2   | 22 adults              | Higher CHO vs. higher MUFA (olive oil) diet | Higher CHO: CHO 50→52.3% Fat 30→27.9% MUFA 12→13.6% Protein 15→18.9% vs. Higher MUFA: CHO 40→41.4% Fat 40→40.2% MUFA 25→24.9% Protein 15→17.5% | Glycemic measures: NS Higher-MUFA diet decreased VLDL TGs 16% (P = 0.016) and VLDL cholesterol by 35% (P = 0.023) compared with the higher-CHO diet.                                                                                                                                                                      | Weight uncontrolled but stable (isocaloric by design) Fiber significantly higher in CHO diet vs. higher-MUFA (26 g/day vs. 20.7, P = 0.001)                                                                                                                                |
| (27)        | Kodama 2009           | Meta-analysis/1966–2007                            | Type 2   | 19 studies, 306 adults | HFLC diets vs. LFHC diets                   | Median diet composition of CHO/fat in the HFLC and LFHC diets were 24/58% and 40/40%, respectively                                             | 2-h PPG (10 trials), fasting insulin (22 trials), and 2-h fasting insulin (9 trials) increased on LFHC vs. HFLC (10.3%, P < 0.001; 8%, P = 0.02; 12.8%, P < 0.001, respectively) HDL-C decreased by 5.6% (P < 0.001) on LFHC vs. HFLC (20 trials) Fasting TG increased* by 13.4% (P < 0.001) on LFHC vs. HFLC (22 trials) | Weight-loss trials included in the meta-analysis Of the 19 studies included in the meta-analysis, only 3 were published during this systematic review time period and are included in this systematic review (Miyashita [18], and Rodriguez-Villar [26], and Lovejoy [30]) |

Supplementary Table 1—Continued

| Ref. number | Author/year | Study type/duration         | Diabetes | n‡                     | Comparison summary                                                        | Intervention detail¶ dietary variable of interest for observational studies                                               | Significant results**                                                                                                                                                                                                                                                                                                                                                                                                                                                                                                                          | Comments/study limitations#                                                                                                                                                                                                                              |
|-------------|-------------|-----------------------------|----------|------------------------|---------------------------------------------------------------------------|---------------------------------------------------------------------------------------------------------------------------|------------------------------------------------------------------------------------------------------------------------------------------------------------------------------------------------------------------------------------------------------------------------------------------------------------------------------------------------------------------------------------------------------------------------------------------------------------------------------------------------------------------------------------------------|----------------------------------------------------------------------------------------------------------------------------------------------------------------------------------------------------------------------------------------------------------|
| (28)        | Kirk 2008   | Meta-analysis/<br>1980–2006 | Type 2   | 13 studies, 263 adults | Lower-CHO diets vs. higher-CHO diets; lower-CHO diets, single-arm studies | Lower-CHO diets: 29 ± 14% kcal from CHO, range 4–45% vs. higher-CHO comparison diets: 55 ± 8% kcal from CHO, range 40–70% | Greater mean reduction with lower CHO vs. higher CHO for FPG; regression analysis: 10% increase in CHO calorie intake associated with 3.2 ± 1.2% increase in glucose, P = 0.047<br>A1C was reduced more on lower-CHO diet (9 of the 11 trials)<br>In regression controlling for diet-phase duration, strong relationship between low-CHO phase and lower-TG levels, 10% increase in CHO calorie intake associated with 7.6 ± 0.6% increase in TG change, P = 0.001<br>TG reductions for both lower- and higher-CHO diets (11 of the 11 trials) | Weight loss a confounding factor in 6 studies<br>Of the 13 studies in the meta-analysis, only 4 were published during this systematic review time period and met this systematic review criteria (Boden [10], Yancy [14], Gerhard [22], and Gannon [25]) |

Supplementary Table 1—Continued

| Ref. number | Author/year     | Study type/duration                                                                 | Diabetes | n‡        | Comparison summary                                                                               | Intervention detail¶ dietary variable of interest for observational studies                                                                                                                                                                                                                                                                                                   | Significant results**                                                                                                                                                                                | Comments/study limitations#                                                                                                                                                                                                                                         |
|-------------|-----------------|-------------------------------------------------------------------------------------|----------|-----------|--------------------------------------------------------------------------------------------------|-------------------------------------------------------------------------------------------------------------------------------------------------------------------------------------------------------------------------------------------------------------------------------------------------------------------------------------------------------------------------------|------------------------------------------------------------------------------------------------------------------------------------------------------------------------------------------------------|---------------------------------------------------------------------------------------------------------------------------------------------------------------------------------------------------------------------------------------------------------------------|
| (29)        | Rosenfalck 2006 | RCT crossover/<br>3 months each                                                     | Type 1   | 10 adults | Lower-fat diet vs. conventional “diabetes” diet (European Association for the Study of Diabetes) | Lower-fat diet:<br>CHO 55→51.4%<br>Fat 25→26.2%<br>Protein 20→21.1%<br>vs.<br>Conventional diet:<br>CHO 55→48.7%<br>Fat 30→31.2%<br>Protein 15→15.1%                                                                                                                                                                                                                          | Insulin sensitivity by euglycemic-hyperinsulinemic clamp improved on the lower-fat diet compared with the conventional diet (7.06 vs. 5.52 g/kg/min, <i>P</i> = 0.03)<br>CVD risk measures: not done | 77% completion rate<br>Washout period not provided<br>Body composition remained constant (isocaloric by design)<br>Raw food materials for lower-fat diet were delivered to patients who then prepared their own meals<br>A1C increased from baseline for both diets |
| (30)        | Lovejoy 2002    | RCT crossover, double blind, 4 arms/4 weeks each (minimum of 2-week washout period) | Type 2   | 30 adults | Higher fat/high almond vs. lower fat/high almond vs. higher fat control vs. lower-fat control    | Higher fat/high almonds:<br>CHO 48%<br>Fat 37% (10% from almonds)<br>Protein 15%<br>vs.<br>Lower fat/high almonds:<br>CHO 60%<br>Fat 25% (10% from almonds)<br>Protein 15%<br>vs.<br>Higher-fat control:<br>CHO 48%<br>Fat 37% (10% from olive or canola oil)<br>Protein 15%<br>vs.<br>Lower-fat control:<br>CHO 60%<br>Fat 25% (10% from olive or canola oil)<br>Protein 15% | Glycemic measures: NS<br>HDL-C lower in the almond-enriched groups ( <i>P</i> = 0.002)                                                                                                               | All foods provided during the study<br>Weight controlled<br>Fiber almost doubled during the almond diets vs. the control Almonds (57–113 g/day depending on total energy level) and the control oils were all high in MUFA                                          |

Supplementary Table 1—Continued

| Ref. number                  | Author/year   | Study type/duration                                | Diabetes | n‡     | Comparison summary               | Intervention detail¶ dietary variable of interest for observational studies                                                                                                                                                                        | Significant results**                                                                                                                                                                                                                                                                                                                                                                                                                 | Comments/study limitations#                                                                                                                                                                                                                                                                                                                                                         |
|------------------------------|---------------|----------------------------------------------------|----------|--------|----------------------------------|----------------------------------------------------------------------------------------------------------------------------------------------------------------------------------------------------------------------------------------------------|---------------------------------------------------------------------------------------------------------------------------------------------------------------------------------------------------------------------------------------------------------------------------------------------------------------------------------------------------------------------------------------------------------------------------------------|-------------------------------------------------------------------------------------------------------------------------------------------------------------------------------------------------------------------------------------------------------------------------------------------------------------------------------------------------------------------------------------|
| <b>Carbohydrate type: GI</b> |               |                                                    |          |        |                                  |                                                                                                                                                                                                                                                    |                                                                                                                                                                                                                                                                                                                                                                                                                                       |                                                                                                                                                                                                                                                                                                                                                                                     |
| (31)                         | Kabir 2002    | RCT crossover/4 weeks each (15-day washout period) | Type 2   | 13 men | Higher-GI vs. lower-GI breakfast | Higher-GI breakfast: whole-grain cereal, whole-wheat bread vs. lower-GI breakfast: whole-grain bread and muesli containing 3 g β-glucan from oats                                                                                                  | Glycemic measures: NS<br>TC lower after the lower-GI breakfast period than the higher-GI breakfast period ( $P < 0.03$ )                                                                                                                                                                                                                                                                                                              | Weight not controlled<br>Fiber content comparable between breakfasts                                                                                                                                                                                                                                                                                                                |
| (19)                         | Wolever 2008  | See "Carbohydrate amount: lower carbohydrate"      |          |        |                                  |                                                                                                                                                                                                                                                    |                                                                                                                                                                                                                                                                                                                                                                                                                                       |                                                                                                                                                                                                                                                                                                                                                                                     |
| (32)                         | Rizkalla 2004 | RCT crossover/4 weeks                              | Type 2   | 12 men | Lower-GI vs. higher-GI diets     | Usual diet with change in type of CHO only<br>Lower GI: pumpernickel, pasta, lentils, haricot, mung beans, chickpeas; achieved GI = 39 units<br>vs.<br>Higher GI: whole-meal bread, French baguettes, potatoes, white rice; achieved GI = 71 units | A1C lower on lower-GI diet vs. higher-GI diet (7.17 vs. 7.57%) ( $P < 0.05$ )<br>Incremental AUCs for plasma glucose (8-h metabolic profiles at 4 weeks) lower on lower-GI diet vs. higher-GI diet ( $P < 0.05$ )<br>TC and LDL-C decreased on lower-GI diet vs. higher-GI diet (glucose disposal: 7 vs. 4.8 mg glucose/kg/min) ( $P < 0.001$ )<br>Apolipoprotein B decreased more on lower-GI diet vs. higher-GI diet ( $P < 0.01$ ) | Weight not controlled, did not change<br>Fiber significantly higher on lower-GI diet vs. higher-GI diet ( $P < 0.0001$ )<br>Insulin sensitivity (clamp technique) significantly higher on lower-GI diet vs. higher-GI diet<br>(glucose disposal: 7 vs. 4.8 mg glucose/kg/min) ( $P < 0.001$ )<br>Apolipoprotein B decreased more on lower-GI diet vs. higher-GI diet ( $P < 0.01$ ) |

Supplementary Table 1—Continued

| Ref. number | Author/year       | Study type/duration                           | Diabetes | n‡        | Comparison summary           | Intervention detail¶ dietary variable of interest for observational studies                                                                                                                                                                                | Significant results**                                                                                                                                                                                                   | Comments/study limitations#                                                                                                                                                         |
|-------------|-------------------|-----------------------------------------------|----------|-----------|------------------------------|------------------------------------------------------------------------------------------------------------------------------------------------------------------------------------------------------------------------------------------------------------|-------------------------------------------------------------------------------------------------------------------------------------------------------------------------------------------------------------------------|-------------------------------------------------------------------------------------------------------------------------------------------------------------------------------------|
| (33)        | Jimenez-Cruz 2003 | RCT crossover/6 weeks (6-week washout period) | Type 2   | 14 adults | Lower vs. higher GI          | Typical lower-GI foods: oranges, beans, yogurt, pasta, corn tortillas; achieved GI and GL, 44 and 86 units, respectively vs. Typical higher-GI foods: corn flakes, white bread, potatoes, ripe bananas; achieved GI and GL, 56 and 139 units, respectively | A1C lower after the lower-GI period vs. after the higher-GI period (8.1 vs. 8.6%) (P = 0.02)<br>FBG lower during the lower-GI period vs. the higher-GI period (8.9 vs. 10.0 mmol/L) (P = 0.04)<br>CVD risk measures: NS | 39% completion rate<br>Weight not controlled (weight decreased significantly more with lower GI vs. higher GI [90.1 vs. 92.0 kg, P = 0.04])<br>Fiber higher on lower GI (P = 0.003) |
| (34)        | Heilbronn 2002    | RCT parallel/8 weeks                          | Type 2   | 45 adults | Lower-GI vs. higher-GI diets | Both diets were similar in composition:<br>Lower GI:<br>CHO 60→58.9%<br>Fat 15→17.9%<br>Protein 20→22%<br>GI goal 43 units<br>vs.<br>Higher GI:<br>CHO 60→60.8%<br>Fat 15→17.1%<br>Protein 20→21.7%<br>GI goal 75 units                                    | Glycemic measures: NS<br>CVD risk measures: NS                                                                                                                                                                          | Weight-loss study<br>Key foods were provided<br>Achieved GI units/group not provided                                                                                                |

Supplementary Table 1—Continued

| Ref. number | Author/year  | Study type/duration   | Diabetes | n‡         | Comparison summary                     | Intervention detail¶ dietary variable of interest for observational studies                                                                                                                            | Significant results**                                                                                                                                                                                                                                                                                                                                                                                                                                               | Comments/study limitations#                |
|-------------|--------------|-----------------------|----------|------------|----------------------------------------|--------------------------------------------------------------------------------------------------------------------------------------------------------------------------------------------------------|---------------------------------------------------------------------------------------------------------------------------------------------------------------------------------------------------------------------------------------------------------------------------------------------------------------------------------------------------------------------------------------------------------------------------------------------------------------------|--------------------------------------------|
| (35)        | Jenkins 2008 | RCT parallel/6 months | Type 2   | 155 adults | High-cereal fiber diet vs. low-GI diet | Goal to keep fiber constant while reducing GI<br>10-20 points<br>End-of-study lower-GI diet: 69.6 units and 18.7 g fiber/1,000 kcal vs. high-cereal fiber diet: 83.5 units and 15.7 g fiber/1,000 kcal | In ITT analysis: A1C decreased by -0.50% absolute units in the lower-GI compared with -0.18% in the high-cereal fiber diet ( $P < 0.001$ ). The difference was still significant after controlling for changes in body weight, fiber, or carbohydrate<br>FBG decreased in lower GI vs. higher-cereal fiber ( $P < 0.02$ )<br>HDL-C increased in the lower-GI diet by 1.7 mg/dL compared with a decrease of -0.2 mg/dL in the high-cereal fiber diet ( $P = 0.005$ ) | Weight uncontrolled<br>74% completion rate |

Supplementary Table 1—Continued

| Ref. number | Author/year     | Study type/duration                                           | Diabetes | n‡        | Comparison summary                     | Intervention detail¶ dietary variable of interest for observational studies                                                                                                                                                                        | Significant results**                                                                                                                                   | Comments/study limitations#                                                                                                                                                                                                       |
|-------------|-----------------|---------------------------------------------------------------|----------|-----------|----------------------------------------|----------------------------------------------------------------------------------------------------------------------------------------------------------------------------------------------------------------------------------------------------|---------------------------------------------------------------------------------------------------------------------------------------------------------|-----------------------------------------------------------------------------------------------------------------------------------------------------------------------------------------------------------------------------------|
| (36)        | Ma 2008         | RCT parallel/12 months                                        | Type 2   | 40 adults | Lower-GI vs. traditional diabetes diet | Lifestyle education: Both groups: goal of 55% CHO, NCEP fat guidelines<br>Lower-GI group: reduce GI to 55 units from baseline. Achieved GI at 12 months; 76 units vs. traditional diabetes group: CHO counting. Achieved GI at 12 months; 80 units | Glycemic measure (A1C): NS<br>LDL-C higher in the lower-GI group than in the traditional diabetes group at 12 months, 94.50 vs. 71.49 mg/dL (P = 0.048) | Weight not controlled; not a weight-loss study; weight and waist circumference did not differ between groups<br>Both diets reduced A1C and TC from baseline to end of study                                                       |
| (16)        | Westman 2008    | See "Carbohydrate amount: lower carbohydrate"                 |          |           |                                        |                                                                                                                                                                                                                                                    |                                                                                                                                                         |                                                                                                                                                                                                                                   |
| (37)        | Gilbertson 2001 | Prospective, stratified, randomized, parallel study/12 months | Type 1   | 89 youths | Lower-GI diet vs. CHO-exchanges diet   | Lifestyle intervention: Measured CHO-exchange diets vs. a more flexible food pyramid-type diet with lower-GI dietary advice                                                                                                                        | A1C was lower for lower GI (7.77 ± 0.79%) compared with CHO exchanges (8.76 ± 1.07%) (P = 0.002)<br>CVD risk measures: not done                         | Weight not controlled<br>Despite difference in dietary instruction, there was no difference in mean achieved GI between the 2 groups (56.5 ± 4.0 and 55.3 ± 4.8) (P = 0.26)<br>Many patients appeared to under-report food intake |

Supplementary Table 1—Continued

| Ref. number | Author/year       | Study type/duration             | Diabetes      | n‡                                | Comparison summary                        | Intervention detail¶ dietary variable of interest for observational studies | Significant results**                                                                                                                                                                          | Comments/study limitations#                                                                                          |
|-------------|-------------------|---------------------------------|---------------|-----------------------------------|-------------------------------------------|-----------------------------------------------------------------------------|------------------------------------------------------------------------------------------------------------------------------------------------------------------------------------------------|----------------------------------------------------------------------------------------------------------------------|
| (38)        | Burani 2006       | Retrospective cohort (pre/post) | Types 1 and 2 | 21 adults                         | GI                                        | Pre- and post-low-GI medical nutrition therapy                              | In individuals with stable/improved A1C after initiation of low-GI medical nutrition therapy, A1C improved (pre: 7.5% to post: 6%) (P < 0.0005)                                                | BMI significantly reduced<br>Meds reduced in most subjects<br>GI significantly reduced (mean pre = 59 vs. post = 44) |
| (39)        | Cheong 2009       | RCT parallel/16 weeks           | Type 2        | 38 adults                         | Walk vs. eat more lower-GI foods and walk | Lifestyle education: Walk more vs. eat more lower-GI foods and walk more    | Glycemic measure (A1C): NS<br>CVD risk measures: not done                                                                                                                                      | Subjects were in good glycemic control before the study                                                              |
| (40)        | Brand-Miller 2003 | Meta-analysis/1981–2001         | Type 1 and 2  | 14 studies, 356 youths and adults | Lower GI vs. higher GI                    | Lower GI: average 65 vs. higher GI: average 83                              | A1C reduced 0.34% points more and fructosamine reduced 0.18 mmol/L more with lower-GI diet vs. higher-GI diet, adjusting for baseline and assuming independence<br>CVD risk measures: not done | All meta-analysis references, except Gilbertson (37), were published before the start date of this systematic review |



Supplementary Table 1—Continued

| Ref. number | Author/year   | Study type/duration                                                                   | Diabetes     | n‡                                | Comparison summary                                            | Intervention detail¶ dietary variable of interest for observational studies                                             | Significant results**                                                                                                                                       | Comments/study limitations#                                                                                                                                                                                                                                                                                                                                              |
|-------------|---------------|---------------------------------------------------------------------------------------|--------------|-----------------------------------|---------------------------------------------------------------|-------------------------------------------------------------------------------------------------------------------------|-------------------------------------------------------------------------------------------------------------------------------------------------------------|--------------------------------------------------------------------------------------------------------------------------------------------------------------------------------------------------------------------------------------------------------------------------------------------------------------------------------------------------------------------------|
| (41)        | Anderson 2004 | Meta-analysis/Articles included were published between 1978 and 2000                  | Type 1 and 2 | a. 174<br>b. 167<br>c. 143        | a. MCHF vs. MCLF<br>b. HCHF vs. MCLF<br>c. Low GI vs. high GI | Moderate CHO: 30–59.9% kcal<br>Higher CHO: ≥60% kcal<br>Higher fiber: ≥20 g/1,000 kcal<br>Lower fiber: <10 g/1,000 kcal | PPG reduced significantly (an average of 21%) with MCHF vs. MCLF<br>TC, LDL-C, and TG reduced significantly (7, 8, and 8%, respectively) with MCHF vs. MCLF | MCHF vs. MCLF associated with an insignificant decrease in FBG, average daily plasma glucose and HDL-C<br>HCHF vs. MCLF associated with reduced FBG, PPg, average plasma glucose, AIC, TC, LDL-C, HDL-C, and TG<br>Low GI vs. high GI associated with reduced FBG and AIC<br>All meta-analysis references were published before the start date of this systematic review |
| (42)        | Thomas 2009   | Meta-analysis/inception of databases (MEDLINE, EMBASE, CINAHL, Cochrane) to June 2008 | Type 1 and 2 | 11 studies, 402 youths and adults | Lower GI/GL                                                   | Lower GI in individuals with diabetes not optimally controlled                                                          | AIC decreased by 0.5% with lower-GI diet ( $P = 0.02$ for parallel trials and $P = 0.03$ for crossover trials)<br>CVD risk measures: not done               | Cochrane Library<br>Of the 11 studies included in the meta-analysis, only 3 were published during/after 2001 and are included in this systematic review (Rizkalla [32], Jimenez-Cruz [33], and Gilbertson [37])                                                                                                                                                          |

Supplementary Table 1—Continued

| Ref. number                             | Author/year | Study type/duration                        | Diabetes | n‡        | Comparison summary                            | Intervention detail¶ dietary variable of interest for observational studies    | Significant results**                                                                                                                                                                                                              | Comments/study limitations#                                                                                                                                                                                                                                                                                                                                                                                    |
|-----------------------------------------|-------------|--------------------------------------------|----------|-----------|-----------------------------------------------|--------------------------------------------------------------------------------|------------------------------------------------------------------------------------------------------------------------------------------------------------------------------------------------------------------------------------|----------------------------------------------------------------------------------------------------------------------------------------------------------------------------------------------------------------------------------------------------------------------------------------------------------------------------------------------------------------------------------------------------------------|
| (43)                                    | Qi 2005     | Cross-sectional                            | Type 2   | 780 men   | Semi-quantitative FFQ in 1986, 1990, and 1994 | GI, GL intake of dietary fibers and adiponectin                                | Glycemic and CVD risk measures: not done                                                                                                                                                                                           | Health Professionals' Follow-up Study<br>Trend toward lower adiponectin levels with increasing quintiles of GI (13% lower in highest adiponectin quintile compared to the lowest $P = 0.005$ ) and also with GI (18% lower in highest quintile than the lowest $P$ for trend = 0.004); adiponectin levels 19% higher in highest quintile than lowest quintile for cereal fiber intake ( $P$ for trend = 0.003) |
| <b>Carbohydrate type: dietary fiber</b> |             |                                            |          |           |                                               |                                                                                |                                                                                                                                                                                                                                    |                                                                                                                                                                                                                                                                                                                                                                                                                |
| (45)                                    | Ziai 2005   | RCT parallel, double blind, 2 arms/8 weeks | Type 2   | 36 adults | Psyllium fiber vs. inert control (cellulose)  | 2 packets (5.1-g each) of psyllium/day in water vs. microcrystalline cellulose | A1C decreased from 10.5 to 8.9% ( $P < 0.001$ ) in psyllium group and increased from 9.1 to 10.5% ( $P < 0.05$ ) in control group<br>HDL-C increased in psyllium group and decreased in control group ( $P < 0.05$ between groups) | Weight controlled<br>73% completion rate                                                                                                                                                                                                                                                                                                                                                                       |

Supplementary Table 1—Continued

| Ref. number | Author/year  | Study type/duration                             | Diabetes | n‡        | Comparison summary                                                                            | Intervention detail¶ dietary variable of interest for observational studies                                                                                                                                                                                                  | Significant results**                                                                                                                                                                                                        | Comments/study limitations#                                                                      |
|-------------|--------------|-------------------------------------------------|----------|-----------|-----------------------------------------------------------------------------------------------|------------------------------------------------------------------------------------------------------------------------------------------------------------------------------------------------------------------------------------------------------------------------------|------------------------------------------------------------------------------------------------------------------------------------------------------------------------------------------------------------------------------|--------------------------------------------------------------------------------------------------|
| (46)        | Magnoni 2008 | RCT parallel, double blind, 2 arms/12 weeks     | Type 2   | 36 adults | Diabetes-specific oral nutrition supplement vs. control (isocaloric standard oral supplement) | In addition to regular diet, subjects consumed two 200 mL/day of a diabetes-specific supplement: 35% CHO, 49% fat (34% kcal as MUFA), 2.5 g fiber/100 mL vs. a standard supplement: 55% CHO, 34% fat (17% kcal as MUFA), 0 fiber                                             | At 12 weeks, 150- and 210-min PPG increases were significantly lower in intervention group vs. control ( $P < 0.001$ )<br>CVD risk measures: not done                                                                        | Weight uncontrolled                                                                              |
| (47)        | Lu 2004      | RCT crossover/ 5-weeks each (no washout period) | Type 2   | 15 adults | Arabinoxy/lan fiber in bread vs. bread without the fiber                                      | Fiber-enriched bread/muffin products (50% whole-wheat flour, 36% white flour, 14% fiber-enriched flour) vs. control products (50% whole-wheat flour and 50% white). Subjects replaced most starchy foods with 4–5 slices of bread and 1–2 muffins, depending on energy needs | Added-fiber diet 2-h PPG (by 75-g OGTT) was lower than control diet ( $P = 0.001$ ), as was serum insulin ( $P = 0.015$ ); serum fructosamine was lower after fiber diet vs. control ( $P = 0.02$ )<br>CVD risk measures: NS | Weight uncontrolled but no significant difference between groups<br>Completion rate not provided |

Supplementary Table 1—Continued

| Ref. number | Author/year  | Study type/duration                                                 | Diabetes | n‡        | Comparison summary                           | Intervention detail¶ dietary variable of interest for observational studies                                                                                                                                                                | Significant results*#                          | Comments/study limitations#                                                                                                                                                                                         |
|-------------|--------------|---------------------------------------------------------------------|----------|-----------|----------------------------------------------|--------------------------------------------------------------------------------------------------------------------------------------------------------------------------------------------------------------------------------------------|------------------------------------------------|---------------------------------------------------------------------------------------------------------------------------------------------------------------------------------------------------------------------|
| (48)        | Vuksan 2007  | RCT crossover, single blind/12 weeks each (4–6-week washout period) | Type 2   | 20 adults | Salba (novel whole grain) vs. wheat bran     | 37 ± 4 g/day of Salba or wheat bran                                                                                                                                                                                                        | Glycemic measures: NS<br>CVD risk measures: NS | Weight controlled<br>74% completion rate<br>A1C significantly reduced (6.9–6.7% from baseline to 12 weeks in Salba group ( $P < 0.05$ ))<br>High-sensitivity CRP lower in Salba group ( $P = 0.04$ ) vs. wheat bran |
| (49)        | Jenkins 2002 | RCT crossover/3 months each (2-month washout period)                | Type 2   | 23 adults | Wheat bran fiber vs. control (no wheat bran) | Wheat bran-enriched bread and cereal (24% of daily energy needs, average of 19 g fiber/day) vs. control white bread and cereal (24% daily energy needs, 4 g fiber/day) provided as sole source of bread and cereal for 3-month period each | Glycemic measures: NS<br>CVD risk measures: NS | Weight uncontrolled, but no significant difference between groups<br>34% completion rate                                                                                                                            |

Supplementary Table 1—Continued

| Ref. number | Author/year       | Study type/duration                                                | Diabetes | n‡              | Comparison summary                                            | Intervention detail¶ dietary variable of interest for observational studies                                                                                                                          | Significant results**                                                                                                                                      | Comments/study limitations#                                                                                                                                                                                                                                                                                    |
|-------------|-------------------|--------------------------------------------------------------------|----------|-----------------|---------------------------------------------------------------|------------------------------------------------------------------------------------------------------------------------------------------------------------------------------------------------------|------------------------------------------------------------------------------------------------------------------------------------------------------------|----------------------------------------------------------------------------------------------------------------------------------------------------------------------------------------------------------------------------------------------------------------------------------------------------------------|
| (50)        | Cho 2005          | RCT parallel, 2 arms/2 months                                      | Type 2   | 30 adults       | Soluble fiber (Cassia tora, a herbal legume) vs. maltodextrin | Powder packet containing 2 g soluble fiber from Cassia tora plus 200 mg $\alpha$ -tocopherol, 500 mg vitamin C, 300 mg maltodextrin vs. 3-g packet of maltodextrin only (2 packets/day for 2 months) | Glycemic measures: NS<br>CVD risk measures: NS                                                                                                             | Weight uncontrolled, but anthropometric indices did not change<br>71% completion rate                                                                                                                                                                                                                          |
| (51)        | Ble-Castillo 2010 | RCT crossover/4 weeks (blinded within subject) (no washout period) | Type 2   | 28 obese adults | Native banana starch vs. soy milk                             | 24 g native banana starch powder per day vs. control of 24 g soy milk powder, each dissolved in water                                                                                                | Glycemic measures: NS<br>Soy milk significantly reduced serum TG (baseline to end, $P < 0.05$ ) and compared with the native banana starch ( $P = 0.012$ ) | Weight uncontrolled (more weight was lost with native banana starch than with soy milk)<br>Other treatments and medicines were controlled<br>Fasting insulin concentration and insulin sensitivity (HOMA) improved, baseline to end for native banana starch group ( $P = 0.01$ and $P < 0.05$ , respectively) |
| (35)        | Jenkins 2008      | See "Carbohydrate type: GI"                                        |          |                 |                                                               |                                                                                                                                                                                                      |                                                                                                                                                            |                                                                                                                                                                                                                                                                                                                |

Supplementary Table 1—Continued

| Ref. number | Author/year    | Study type/duration                            | Diabetes | n‡        | Comparison summary                                                                                   | Intervention detail¶ dietary variable of interest for observational studies                                                                                        | Significant results**                                                                                                                                                                                                                                                                                                                                                                                                                   | Comments/study limitations# |
|-------------|----------------|------------------------------------------------|----------|-----------|------------------------------------------------------------------------------------------------------|--------------------------------------------------------------------------------------------------------------------------------------------------------------------|-----------------------------------------------------------------------------------------------------------------------------------------------------------------------------------------------------------------------------------------------------------------------------------------------------------------------------------------------------------------------------------------------------------------------------------------|-----------------------------|
| (52)        | De Natale 2009 | RCT crossover/4 weeks each (no washout period) | Type 2   | 18 adults | Higher CHO (higher fiber, lower fat and GI) vs. higher MUFA (lower CHO and fiber, higher fat and GI) | Isocaloric diets: Higher CHO vs. higher MUFA (achieved)<br>CHO: 51 vs. 44%<br>Fiber: 27 vs. 8 g/1,000 kcal<br>Fat: 30 vs. 37%<br>MUFA: 17 vs. 23%<br>GI: 60 vs. 87 | After the end of study, higher-CHO, higher-fiber test meal vs. the MUFA test meal: Plasma glucose IAUC decreased until the third hour ( $P < 0.05$ )<br>Significant reduction in insulin IAUC (by 14 and 21% at 3 and 6 h, respectively ( $P < 0.05$ ))<br>Decrease of nearly 50% in postprandial glycemic variability ( $P < 0.02$ )<br>Fasting TC, LDL-C, and HDL-C significantly reduced, higher CHO vs. MUFA ( $P < 0.05$ for each) |                             |

Supplementary Table 1—Continued

| Ref. number | Author/year | Study type/duration | Diabetes | n‡        | Comparison summary               | Intervention detail¶ dietary variable of interest for observational studies                          | Significant results**                    | Comments/study limitations#                                                                                                                                                                                                                                                                                                                       |
|-------------|-------------|---------------------|----------|-----------|----------------------------------|------------------------------------------------------------------------------------------------------|------------------------------------------|---------------------------------------------------------------------------------------------------------------------------------------------------------------------------------------------------------------------------------------------------------------------------------------------------------------------------------------------------|
| (53)        | Qi 2006     | Cross-sectional     | Type 2   | 902 women | Semi-quantitative FFQ, past year | Intake of cereal and fruit fiber, dietary GL and GI, and marker of insulin sensitivity (adiponectin) | Glycemic and CVD risk measures: not done | Nurses' Health Study<br>Weight controlled<br>Cereal fiber and fruit fiber positively associated with increasing adiponectin ( $P = 0.002$ and $P = 0.036$ , respectively) after adjusting for confounding variables<br>GL and GI negatively associated with adiponectin only after adjustment for BMI ( $P = 0.01$ and $P = 0.03$ , respectively) |

Supplementary Table 1—Continued

| Ref. number | Author/year | Study type/duration | Diabetes | n‡        | Comparison summary | Intervention detail¶ dietary variable of interest for observational studies                                     | Significant results**                    | Comments/study limitations#                                                                                                                                                                                                                                                                                                                                                                                                  |
|-------------|-------------|---------------------|----------|-----------|--------------------|-----------------------------------------------------------------------------------------------------------------|------------------------------------------|------------------------------------------------------------------------------------------------------------------------------------------------------------------------------------------------------------------------------------------------------------------------------------------------------------------------------------------------------------------------------------------------------------------------------|
| (54)        | Qi 2006     | Cross-sectional     | Type 2   | 902 women | FFQ                | Intake of whole grain, bran, cereal fiber, dietary GL and GI, and markers of systematic inflammation (CRP, TNF) | Glycemic and CVD risk measures: not done | Nurses' Health Study<br>Weight controlled<br>Decreasing levels of CRP with higher intakes of whole grains and bran (P for trend = 0.03, P for trend = 0.007, respectively)<br>Decreasing levels of TNF-R2 with higher intakes of whole grains (P for trend = 0.017)<br>High dietary glycemic index was associated with significantly increasing trend of CRP and TNF-R2 levels (P for trend = 0.04 and 0.0008, respectively) |



Supplementary Table 1—Continued

| Ref. number | Author/year    | Study type/duration          | Diabetes                                       | n‡          | Comparison summary              | Intervention detail¶ dietary variable of interest for observational studies | Significant results**                                                                                                                                                                              | Comments/study limitations#                                                                                                                                                                                                                                                                                   |
|-------------|----------------|------------------------------|------------------------------------------------|-------------|---------------------------------|-----------------------------------------------------------------------------|----------------------------------------------------------------------------------------------------------------------------------------------------------------------------------------------------|---------------------------------------------------------------------------------------------------------------------------------------------------------------------------------------------------------------------------------------------------------------------------------------------------------------|
| (55)        | Stemburgo 2009 | Cross-sectional              | Type 2, with or without the metabolic syndrome | 214 adults  | 3-day weighed diet              | Dietary fiber intake                                                        | Glycemic measures: NS<br>Protective effect with soluble fiber from whole-grain foods for TG, metabolic syndrome vs. no metabolic syndrome ( $P = 0.03$ )                                           | Subjects with both diabetes and the metabolic syndrome had lower intakes of both total dietary fiber and soluble fiber, mainly from fruits and whole grains (16.7 g/day vs. 19.5, $P < 0.010$ and 5.3 g/day vs. 6, $P < 0.011$ , respectively) than subjects with diabetes but without the metabolic syndrome |
| (41)        | Anderson 2004  | See "Carbohydrate type: GI"  |                                                |             |                                 |                                                                             |                                                                                                                                                                                                    |                                                                                                                                                                                                                                                                                                               |
| (43)        | Qi 2005        | See "Carbohydrate type: GI"  |                                                |             |                                 |                                                                             |                                                                                                                                                                                                    |                                                                                                                                                                                                                                                                                                               |
| (56)        | He 2010        | Prospective cohort/1980–2002 | Type 2                                         | 7,822 women | Semi-quantitative FFQ (7 years) | Whole grain, cereal fiber, bran, and germ                                   | Glycemic measures: not done<br>In a fully adjusted model (lifestyle and dietary variables considered), only the inverse association between bran intake and CVD-specific mortality was significant | Nurses' Health Study                                                                                                                                                                                                                                                                                          |

Supplementary Table 1—Continued

| Ref. number       | Author/year     | Study type/duration                                      | Diabetes | n‡                                  | Comparison summary          | Intervention detail¶ dietary variable of interest for observational studies                                                                                                | Significant results**                                                                                       | Comments/study limitations#                                                               |
|-------------------|-----------------|----------------------------------------------------------|----------|-------------------------------------|-----------------------------|----------------------------------------------------------------------------------------------------------------------------------------------------------------------------|-------------------------------------------------------------------------------------------------------------|-------------------------------------------------------------------------------------------|
| <b>Fat amount</b> |                 |                                                          |          |                                     |                             |                                                                                                                                                                            |                                                                                                             |                                                                                           |
| (21)              | Barnard 2009    | See "Carbohydrate amount: moderate to high carbohydrate" |          |                                     |                             |                                                                                                                                                                            |                                                                                                             |                                                                                           |
| (22)              | Gerhard 2004    | See "Carbohydrate amount: moderate to high carbohydrate" |          |                                     |                             |                                                                                                                                                                            |                                                                                                             |                                                                                           |
| (29)              | Rosenfalck 2006 | See "Carbohydrate amount: moderate to high carbohydrate" |          |                                     |                             |                                                                                                                                                                            |                                                                                                             |                                                                                           |
| (23)              | Wycherley 2010  | See "Carbohydrate amount: moderate to high carbohydrate" |          |                                     |                             |                                                                                                                                                                            |                                                                                                             |                                                                                           |
| (57)              | Mostad 2004     | Clinical trial/3 days                                    | Type 2   | 19 adults with hypertriglyceridemia | Usual diet vs. low-fat diet | Usual diet (fat 39%) vs. low-fat diet (subjects advised to increase fiber-rich and low-fat foods and to decrease intake of visible fat in an isoenergetic manner): fat 22% | Glycemic measures: NS<br>TC and HDL-C decreased 6.3–6.2 mmol/L (P < 0.005) and 1.13–1.10 mmol/L (P < 0.048) | Weight not controlled, and negative energy balance resulted with reduction of fat in diet |

Supplementary Table 1—Continued

| Ref. number | Author/year  | Study type/duration           | Diabetes | n‡                                                          | Comparison summary                               | Intervention detail¶ dietary variable of interest for observational studies                                                                                                            | Significant results**                                                                                                                                                          | Comments/study limitations#                                                                                                                                               |
|-------------|--------------|-------------------------------|----------|-------------------------------------------------------------|--------------------------------------------------|----------------------------------------------------------------------------------------------------------------------------------------------------------------------------------------|--------------------------------------------------------------------------------------------------------------------------------------------------------------------------------|---------------------------------------------------------------------------------------------------------------------------------------------------------------------------|
| (58)        | Coppell 2010 | RCT parallel, 2 arms/6 months | Type 2   | 94 adults with persistently unsatisfactory glycemic control | Intensive dietary advice group vs. control group | Intensive dietary advice group, recommendations based on EASD: CHO 45–60→48% Fat <30→28.7% SFA <8–10→9.7% PUFA 10→5.6% Protein no recommendation→22.1% Fiber 40→26.3 g/day             | A1C decreased more in intervention group (8.9 to 8.4%) vs. control group (stable at 8.6%) after adjustment for baseline values, age, and sex (P = 0.007) CVD risk measures: NS | Weight loss was a part of intervention Intervention group reduced diabetes meds significantly                                                                             |
| (59)        | Yip 2001     | RCT parallel, 3 arms/12 weeks | Type 2   | 57 adults                                                   | Meal replacements vs. exchange diet plan         | Slim-Fast (containing lactose, fructose, sucrose) Sugar-free Slim-Fast (fructose and sucrose replaced with oligosaccharides) Exchange diet plan (55–65% CHO, <30% fat, 10–20% protein) | FBG decreased in the Slim-Fast groups over time compared with the exchange diet plan group (P = 0.012) CVD risk measures: NS                                                   | Weight-loss study 76% completion rate No significant differences between Slim-Fast and sugar-free Slim-Fast, so they were pooled and compared with the exchange diet plan |

Supplementary Table 1—Continued

| Ref. number | Author/year        | Study type/duration            | Diabetes | n‡                  | Comparison summary                                            | Intervention detail¶ dietary variable of interest for observational studies                                                           | Significant results**                                                                                                                                                                                                                                                                                                                                                                                                                                                                                                                              | Comments/study limitations#                                              |
|-------------|--------------------|--------------------------------|----------|---------------------|---------------------------------------------------------------|---------------------------------------------------------------------------------------------------------------------------------------|----------------------------------------------------------------------------------------------------------------------------------------------------------------------------------------------------------------------------------------------------------------------------------------------------------------------------------------------------------------------------------------------------------------------------------------------------------------------------------------------------------------------------------------------------|--------------------------------------------------------------------------|
| (60)        | Li 2005            | RCT parallel, 2 arms/12 months | Type 2   | 77 adults           | Soy-based meal replacement vs. individual diet plan           | 1–3 meals/day replaced with Slim-Fast vs. individualized diet (55–65% CHO, <30% fat, 10–20% protein). 500-calorie/day energy deficit. | A1C decreased, Slim-Fast vs. individualized diet, at 3 months only ( $P < 0.05$ )<br>FBG decreased, Slim-Fast vs. individualized diet, at 3 and 6 months only ( $P < 0.05$ )<br>CVD risk measures: NS                                                                                                                                                                                                                                                                                                                                              | 74% completion rate<br>Weight-loss study                                 |
| (61)        | Snell-Bergeon 2009 | Cross-sectional/case-control   | Type 1   | 571 and 696 control | Examined diet variables and correlation with CHD risk factors | Self-administered FFQ                                                                                                                 | A1C correlated with % fat (0.07), % saturated fat (0.06), % MUFA (0.06), % CHO (–0.07), $P < 0.05$ (all correlations)<br>TC correlated with % fat (0.14), % saturated fat (0.12), % trans fat (0.11), % MUFA (0.14), % CHO (–0.14), $P < 0.001$ (all correlations)<br>LDL-C correlated with % fat (0.15), % saturated fat (0.14), % trans fat (0.12), % MUFA (0.16), % PUFA (0.06), % CHO (–0.13), $P < 0.001$ (all correlations)<br>HDL-C negatively correlated and TG positively correlated with GI ( $P < 0.05$ and $P < 0.001$ , respectively) | Weight controlled<br>Part of the baseline examination of the CACTI study |

Supplementary Table 1—Continued

| Ref. number                | Author/year    | Study type/duration                                       | Diabetes | n‡        | Comparison summary    | Intervention detail¶ dietary variable of interest for observational studies                                                                                                                                                                                       | Significant results,**                                                                                                                                                     | Comments/study limitations#                                                                                       |
|----------------------------|----------------|-----------------------------------------------------------|----------|-----------|-----------------------|-------------------------------------------------------------------------------------------------------------------------------------------------------------------------------------------------------------------------------------------------------------------|----------------------------------------------------------------------------------------------------------------------------------------------------------------------------|-------------------------------------------------------------------------------------------------------------------|
| <b>Saturated fat</b>       |                |                                                           |          |           |                       |                                                                                                                                                                                                                                                                   |                                                                                                                                                                            |                                                                                                                   |
| (62)                       | Rivellese 2008 | RCT crossover/3 weeks each (washout period not specified) | Type 2   | 11 adults | SFA vs. MUFA          | Diets isoenergetic by design. SFA-rich diet goal: 17% SFA, 15% MUFA vs. MUFA-rich diet goal: 8% SFA, 23% MUFA. Both diets were designed to contain 46% CHO, 37% fat, 17% protein, 21 g fiber. Cholesterol was 428 mg on the SFA diet and 130 mg on the MUFA diet. | Glycemic measures: NS<br>Decrease in small VLDL triglyceride incremental area after the MUFA diet (−13.6 ± 4.7 mg/dL at 6 h vs. −2.2 ± 3.7 mg/dL at 6 h, <i>P</i> < 0.005) | All lunches and dinners provided to subjects<br>Weight uncontrolled, but no significant difference in body weight |
| <b>Omega-3 fatty acids</b> |                |                                                           |          |           |                       |                                                                                                                                                                                                                                                                   |                                                                                                                                                                            |                                                                                                                   |
| (63)                       | Mostad 2006    | RCT parallel, single blind/9 weeks                        | Type 2   | 26 adults | Fish oil vs. corn oil | Fish oil group: 20 ml fish oil enriched with omega-3 fatty acids vs. corn oil (equal amount)                                                                                                                                                                      | FBG increased in the fish oil group (~1 mmol/L higher than the corn oil group, <i>P</i> = 0.035)<br>CVD risk measures: NS                                                  | Weight not significantly changed during intervention                                                              |

Supplementary Table 1—Continued

| Ref. number | Author/year   | Study type/duration                | Diabetes | n‡        | Comparison summary       | Intervention detail¶ dietary variable of interest for observational studies                                                                    | Significant results**                                                                                                                                                                                                                                                                                                                                                                                                                                                    | Comments/study limitations# |
|-------------|---------------|------------------------------------|----------|-----------|--------------------------|------------------------------------------------------------------------------------------------------------------------------------------------|--------------------------------------------------------------------------------------------------------------------------------------------------------------------------------------------------------------------------------------------------------------------------------------------------------------------------------------------------------------------------------------------------------------------------------------------------------------------------|-----------------------------|
| (64)        | Woodman 2002  | RCT parallel, double blind/6 weeks | Type 2   | 51 adults | EPA or DHA vs. olive oil | 4 g of each oil/day                                                                                                                            | <p>FBG in the EPA and DHA groups increased 1.40 and 0.98 mmol/L (<math>P = 0.002</math> for each), respectively, vs. olive oil</p> <p>TG in EPA and DHA groups decreased 19 and 15% (<math>P = 0.022</math> each), respectively, vs. olive oil</p> <p>HDL-2 in the EPA and DHA groups increased 16% (<math>P = 0.026</math>) and 12% (<math>P = 0.05</math>), respectively, vs. olive oil</p> <p>HDL-3 decreased 11% (<math>P = 0.026</math>) with EPA vs. olive oil</p> | Weight controlled           |
| (65)        | Pedersen 2003 | RCT parallel, double blind/8 weeks | Type 2   | 44 adults | EPA + DHA vs. corn oil   | <p>EPA + DHA: 2.6-g daily in 4 capsules (76% omega-3 and 3.4% omega-6 PUFA) vs. 4 capsules of corn oil (0% omega-3 and 55.9% omega-6 PUFA)</p> | <p>Glycemic measures: NS</p> <p>HDL-C higher in fish oil group (+0.07 mmol/L) vs. -0.01 in corn oil, <math>P = 0.045</math></p> <p>TG lower in fish oil group (-0.53 mmol/L) vs. -0.08 in corn oil, <math>P = 0.025</math></p> <p>LDL-C unsaturation index increased in fish oil group vs. corn oil group</p>                                                                                                                                                            | Weight uncontrolled         |

Supplementary Table 1—Continued

| Ref. number | Author/year  | Study type/duration                 | Diabetes | n‡                        | Comparison summary                                               | Intervention detail¶ dietary variable of interest for observational studies                                                                                                         | Significant results**                                                                                                                                                                                                                                                                  | Comments/study limitations#                                                                                                                                                                                                                |
|-------------|--------------|-------------------------------------|----------|---------------------------|------------------------------------------------------------------|-------------------------------------------------------------------------------------------------------------------------------------------------------------------------------------|----------------------------------------------------------------------------------------------------------------------------------------------------------------------------------------------------------------------------------------------------------------------------------------|--------------------------------------------------------------------------------------------------------------------------------------------------------------------------------------------------------------------------------------------|
| (66)        | Pooya 2010   | RCT parallel, double blind/2 months | Type 2   | 81 adults                 | Omega-3 fatty acids vs. control of sunflower oil                 | Omega-3 fatty acid capsules/day (1,548 mg EPA, 828 mg DHA, 338 mg other omega-3 fatty acid) vs. control capsules/day (2,100 mg sunflower oil, 12% SFA, 71% linoleic acid, 15% MUFA) | AIC decreased in omega-3 fatty acid group (−0.75%) vs. 0.26 in control, $P < 0.001$<br>CVD risk measures: NS                                                                                                                                                                           | Weight uncontrolled                                                                                                                                                                                                                        |
| (67)        | Hartweg 2009 | Meta-analysis/1966–2008             | Type 2   | 24 trials<br>1,533 adults | Fish oil, omega-3 fatty acid, PUFA, EPA, DHA vs. placebo/control | Average daily intake of fish oil during total period was ~2.4 g omega-3 PUFAs over 24 weeks for the 7 studies added 2007–2008                                                       | Glycemic measures: NS<br>TG decreased with omega-3 PUFA supplementation by 7% (mean −0.17 mmol/L; 24 trials; 1,530 participants) vs. control ( $P < 0.0001$ )<br>LDL-C increased with omega-3 PUFA by 3% (mean 0.08 mmol/L; 21 trials; 1,104 participants) vs. control ( $P = 0.006$ ) | Of the 23 studies included in the meta-analysis, 6 meeting this systematic review criteria were published during the systematic review time period (Mostad [63], Woodman [64], Pedersen [65], Petersen [68], Kabir [69], and Shidfar [70]) |

Supplementary Table 1—Continued

| Ref. number | Author/year   | Study type/duration                 | Diabetes | n‡                      | Comparison summary              | Intervention detail¶ dietary variable of interest for observational studies                                                    | Significant results**                                                                                                                                                                                                        | Comments/study limitations# |
|-------------|---------------|-------------------------------------|----------|-------------------------|---------------------------------|--------------------------------------------------------------------------------------------------------------------------------|------------------------------------------------------------------------------------------------------------------------------------------------------------------------------------------------------------------------------|-----------------------------|
| (68)        | Petersen 2002 | RCT parallel, double blind/8 weeks  | Type 2   | 42 adults               | Fish oil vs. corn oil           | 4 g daily of either fish oil or corn oil                                                                                       | Glycemic measures: NS<br>TG decreased 0.54 mmol/L in fish oil group vs. 0.04 mmol/L in corn oil group, <i>P</i> = 0.025<br>HDL-2a reduction was smaller in the fish oil group than in the corn oil group ( <i>P</i> = 0.007) | Weight controlled           |
| (69)        | Kabir 2007    | RCT parallel, double blind/2 months | Type 2   | 27 postmenopausal women | Fish oil vs. paraffin oil       | Fish oil capsules: 3 g/day (1.8 g omega-3 PUFAs: 1.08 g EPA + 0.72 g DHA) vs. paraffin oil capsules: 3 g/day                   | Glycemic measures: NS<br>TG and ratio of TG-to-HDL-C (atherogenic index) were lower in the fish oil group than in the paraffin oil group ( <i>P</i> < 0.03 for each)                                                         | Body weight unchanged       |
| (70)        | Shidfar 2008  | RCT parallel, double blind/10 weeks | Type 2   | 50 adults               | omega-3 fatty acids vs. control | omega-3 fatty acid capsules: 520 mg EPA + 480 mg DHA daily vs. control capsules: 300 mg SFA, 100 mg MUFA, 600 mg linoleic acid | Glycemic measures: NS<br>TG decreased by 31% and TG-to-HDL-C ratio decreased for omega-3 group vs. control ( <i>P</i> = 0.01 and <i>P</i> = 0.04, respectively)                                                              | Weight controlled           |



Supplementary Table 1—Continued

| Ref. number    | Author/year     | Study type/duration                                      | Diabetes | n‡        | Comparison summary | Intervention detail¶ dietary variable of interest for observational studies                           | Significant results**                                                                                                                                                                                                                          | Comments/study limitations#                                                                                                                                                                       |
|----------------|-----------------|----------------------------------------------------------|----------|-----------|--------------------|-------------------------------------------------------------------------------------------------------|------------------------------------------------------------------------------------------------------------------------------------------------------------------------------------------------------------------------------------------------|---------------------------------------------------------------------------------------------------------------------------------------------------------------------------------------------------|
| (71)           | Kesavulu 2002   | Clinical trial, single arm/2 months                      | Type 2   | 34 adults | EPA + DHA          | 1,080 mg EPA + 720 mg DHA daily                                                                       | Glycemic measures: NS<br>HDL-C increased, 0.93 mmol/L before vs. 1.04 mmol/L after therapy ( $P < 0.01$ )<br>TG decreased, 2.07 mmol/L, before vs. 1.54 mmol/L after therapy ( $P < 0.05$ )<br>VLDL-C decreased after treatment ( $P < 0.05$ ) |                                                                                                                                                                                                   |
| (73)           | Belalcazar 2010 | Prospective cohort / baseline and 1 year                 | Type 2   | 2,397     | FFQ                | Marine omega-3 fatty acid intake based on 8 line items in the FFQ inquiring about seafood consumption | AI C: no association at baseline<br>Baseline marine omega-3 fatty acid intake was $162 \pm 138$ mg/d and was inversely associated with TGs ( $P < 0.001$ )                                                                                     | Weight loss was a goal of RCT from which the data came (Look AHEAD)<br>1-year marine omega-3 fatty acid and fried fish intake decreased with the intensive lifestyle intervention ( $P < 0.001$ ) |
| <b>Protein</b> |                 |                                                          |          |           |                    |                                                                                                       |                                                                                                                                                                                                                                                |                                                                                                                                                                                                   |
| (25)           | Gannon 2003     | See "Carbohydrate amount: moderate to high carbohydrate" |          |           |                    |                                                                                                       |                                                                                                                                                                                                                                                |                                                                                                                                                                                                   |

Supplementary Table 1—Continued

| Ref. number | Author/year     | Study type/duration                                                                     | Diabetes | n‡        | Comparison summary               | Intervention detail¶ dietary variable of interest for observational studies                                                                                                                                            | Significant results**                                                                                                                                                                                                   | Comments/study limitations# |
|-------------|-----------------|-----------------------------------------------------------------------------------------|----------|-----------|----------------------------------|------------------------------------------------------------------------------------------------------------------------------------------------------------------------------------------------------------------------|-------------------------------------------------------------------------------------------------------------------------------------------------------------------------------------------------------------------------|-----------------------------|
| (74)        | Parker 2002     | RCT parallel/12 weeks (8-weeks' weight loss intervention + 4-weeks' weight maintenance) | Type 2   | 54 adults | Higher protein vs. lower protein | Higher-protein diet: CHO 40→42.1/42.6%†<br>Fat 30→27.8/27.6%<br>Protein 30→28.1/27.7%<br>vs.<br>Lower-protein diet: CHO 60→54.8/55.0%<br>Fat 25→26.3/26.7%<br>Protein 15→16.4/16/0%<br>Fatty acid % same in both diets | Glycemic measures: NS<br>TC and LDL-C were lower after 12 weeks in the higher-protein group vs. lower-protein group (P = 0.009 for diet-by-time interaction)<br>See Brinkworth 2004 for a 1-year follow-up of the study |                             |
| (24)        | Brinkworth 2004 | See "Carbohydrate amount: moderate to high carbohydrate"                                |          |           |                                  |                                                                                                                                                                                                                        |                                                                                                                                                                                                                         |                             |
| (23)        | Wycherley 2010  | See "Carbohydrate amount: moderate to high carbohydrate"                                |          |           |                                  |                                                                                                                                                                                                                        |                                                                                                                                                                                                                         |                             |

Supplementary Table 1—Continued

| Ref. number                            | Author/year | Study type/duration                       | Diabetes                                                           | n‡                                        | Comparison summary                        | Intervention detail¶ dietary variable of interest for observational studies                                                                         | Significant results**                                      | Comments/study limitations#                                                                                                                                                                 |
|----------------------------------------|-------------|-------------------------------------------|--------------------------------------------------------------------|-------------------------------------------|-------------------------------------------|-----------------------------------------------------------------------------------------------------------------------------------------------------|------------------------------------------------------------|---------------------------------------------------------------------------------------------------------------------------------------------------------------------------------------------|
| <b>Protein/diabetic kidney disease</b> |             |                                           |                                                                    |                                           |                                           |                                                                                                                                                     |                                                            |                                                                                                                                                                                             |
| (75)                                   | Pijls 2002  | RCT parallel, physician blinded/24 months | Type 2 with micro- or macroalbuminuria, or with diabetes > 5 years | 131 adults with a follow-up of ≥12 months | Lower-protein diet vs. usual-protein diet | Lower-protein group: protein 0.8 g/kg/day → 1.11 g/kg/day (at 24 months)<br>vs.<br>Usual-protein group: protein 1.07 g/kg/day achieved at 24 months | Glycemic measures: not done<br>CVD risk measures: not done | Weight not controlled<br>59% retention rate at 24 months<br>No significant differences between groups for GFR or albuminuria                                                                |
| (76)                                   | Meloni 2004 | RCT parallel/1 year                       | Types 1 (24) and 2 (56) with macroalbuminuria                      | 80 adults                                 | Lower-protein diet vs. free-protein diet  | Lower-protein diet: protein 0.8 g/kg/day → 0.86 g/kg/day<br>vs.<br>Free-protein diet: protein 1.24 g/kg/day achieved                                | Glycemic measures: NS<br>CVD risk measures: NS             | Mean body weight decreased significantly in lower-protein group vs. free-protein group<br>No significant difference in renal function (GFR, AER) between groups<br>No signs of malnutrition |

Supplementary Table 1—Continued

| Ref. number | Author/year | Study type/duration  | Diabetes                     | n‡                                                       | Comparison summary                        | Intervention detail¶ dietary variable of interest for observational studies                                                                                                                                                                                                                                                            | Significant results**                          | Comments/study limitations#                                                                                                                                                                                                            |
|-------------|-------------|----------------------|------------------------------|----------------------------------------------------------|-------------------------------------------|----------------------------------------------------------------------------------------------------------------------------------------------------------------------------------------------------------------------------------------------------------------------------------------------------------------------------------------|------------------------------------------------|----------------------------------------------------------------------------------------------------------------------------------------------------------------------------------------------------------------------------------------|
| (77)        | Hansen 2002 | RCT parallel/4 years | Type 1 with macroalbuminuria | 72 (at 1 year) adults                                    | Lower-protein diet vs. usual-protein diet | Lower-protein group: protein 0.6 g/kg/day→ 0.89 g/kg/day (range 0.83–0.95 g) vs. Usual-protein group: protein achieved 1.02 g/kg/day (range 0.95–1.1 g)                                                                                                                                                                                | Glycemic measures: NS<br>CVD risk measures: NS | Weight not controlled, but no significant difference between groups<br>No significant difference between groups for albuminuria or GFR                                                                                                 |
| (78)        | Dussol 2005 | RCT parallel/2 years | Types 1 and 2                | 41 adults with microalbuminuria, 6 with macroalbuminuria | Lower-protein diet vs. usual-protein diet | Lower-protein group (actual): 16 ± 3% kcal as protein vs. usual-protein group (actual): 19 ± 4% kcal as protein. However, calculated (Maroni formula) as g protein/kg/day, the lower-protein group (0.8 g/kg/day prescribed) at baseline, 12 months, and 24 months was 1.08, 1.02, 1.10 vs. the usual-protein group (1.13, 1.18, 1.03) | Glycemic measures: NS<br>CVD risk measures: NS | 75% completion rate<br>During study, body weight and serum albumin were similar between groups<br>No significant difference between groups for GFR, AER, or urinary urea excretion<br>All subjects under strict blood pressure control |

Supplementary Table 1—Continued

| Ref. number | Author/year | Study type/duration                               | Diabetes                                       | n‡                       | Comparison summary                                       | Intervention detail¶ dietary variable of interest for observational studies                                                                                                   | Significant results**                                                                                                                         | Comments/study limitations#                                                                                                                                                                                                                                                                                                                                                                                                                                                                                                                                                                                                                                                                                                          |
|-------------|-------------|---------------------------------------------------|------------------------------------------------|--------------------------|----------------------------------------------------------|-------------------------------------------------------------------------------------------------------------------------------------------------------------------------------|-----------------------------------------------------------------------------------------------------------------------------------------------|--------------------------------------------------------------------------------------------------------------------------------------------------------------------------------------------------------------------------------------------------------------------------------------------------------------------------------------------------------------------------------------------------------------------------------------------------------------------------------------------------------------------------------------------------------------------------------------------------------------------------------------------------------------------------------------------------------------------------------------|
| (79)        | Pan 2008    | Meta-analysis/1966–2007/<br>duration >6<br>months | Types 1 and<br>2 with<br>macro-<br>albuminuria | 8 studies/<br>519 adults | Lower-protein<br>diets vs.<br>control (usual<br>protein) | Lower-protein<br>groups: average<br>protein intake<br>0.91 g/kg/day vs.<br>usual-protein<br>groups: average<br>protein intake<br>1.27 g/kg/day,<br>P = 0.04 for<br>difference | A1C decreased<br>significantly,<br>lower protein<br>vs. control<br>(weighted mean<br>difference,<br>0.31 %)<br>CVD risk measures:<br>not done | Of the 8 studies<br>included in the<br>meta-analysis, 4<br>were published<br>during/after 2001<br>and are included in<br>this systematic<br>review (Pijls [75],<br>Meloni [76], Hansen<br>[77], and Dussol<br>[78])<br>Overall, a change in<br>weighted mean<br>difference for<br>GFR or creatinine<br>clearance rate was<br>not significantly<br>associated with<br>a lower-protein diet<br>Although the benefit<br>of lower-protein diet<br>therapy on<br>proteinuria was<br>significant (P <<br>0.003), great<br>heterogeneity was<br>observed<br>In a subgroup analysis,<br>the change in the<br>weighted mean<br>difference for serum<br>albumin was<br>significant<br>(reduction of 1.18<br>g/L; 95% CI: –1.33<br>to 1.03 g/L) |

Supplementary Table 1—Continued

| Ref. number | Author/year    | Study type/duration                                                                | Diabetes                            | n‡                    | Comparison summary                            | Intervention detail¶ dietary variable of interest for observational studies                           | Significant results**                          | Comments/study limitations#                                                                                                                                                                                                                                                    |
|-------------|----------------|------------------------------------------------------------------------------------|-------------------------------------|-----------------------|-----------------------------------------------|-------------------------------------------------------------------------------------------------------|------------------------------------------------|--------------------------------------------------------------------------------------------------------------------------------------------------------------------------------------------------------------------------------------------------------------------------------|
| (80)        | Robertson 2007 | Meta-analysis/beginning of databases searched through July 2006/duration >4 months | Types 1 and 2 with macroalbuminuria | 12 studies/585 adults | Modified/restricted-protein diets vs. control | Lower-protein diet: actual intake 0.7–1.1 g/kg/day vs. usual-protein diet: actual intake 1–2 g/kg/day | Glycemic measures: NA<br>CVD risk measures: NA | Cochrane Library<br>Of the 12 studies included in the meta-analysis, 3 were published during/after 2001 and met this systematic review criteria (Pijls [75], Meloni [76], and Hansen [77]).<br>No significant difference between lower-protein and usual-protein diets for GFR |

Supplementary Table 1—Continued

| Ref. number | Author/year | Study type/duration                                         | Diabetes | n‡                                                                | Comparison summary                                                   | Intervention detail¶ dietary variable of interest for observational studies                                                                                                                                                                                                                | Significant results**                                                                                                                                                           | Comments/study limitations#                                                                                                                                                                                                                                                                                                                                                                       |
|-------------|-------------|-------------------------------------------------------------|----------|-------------------------------------------------------------------|----------------------------------------------------------------------|--------------------------------------------------------------------------------------------------------------------------------------------------------------------------------------------------------------------------------------------------------------------------------------------|---------------------------------------------------------------------------------------------------------------------------------------------------------------------------------|---------------------------------------------------------------------------------------------------------------------------------------------------------------------------------------------------------------------------------------------------------------------------------------------------------------------------------------------------------------------------------------------------|
| (81)        | Gross 2002  | RCT crossover, 3 arms/4 weeks each (4-week washout periods) | Type 2   | 28 adults (15 with normoalbuminuria and 13 with microalbuminuria) | Usual diet (meat) vs. chicken diet vs. lower-protein/vegetarian diet | Usual diet (meat): protein 1.2–1.5 g/kg/day →1.43 g/kg/day vs. Chicken diet (usual-diet meat replaced by chicken legs): protein 1.2–1.5 g/kg/day →1.35 g/kg/day vs. Lower-protein, vegetarian diet (protein from milk and vegetable sources only): protein 0.5–0.8 g/kg/day →0.66 g/kg/day | Glycemic measures: NS<br>TC significantly lower after chicken diet and low-protein/vegetarian diet as compared with usual diet ( $P < 0.05$ ) in microalbuminuric subjects only | Weight not controlled; energy intake and weight significantly lower during the low-protein/vegetarian diet than other 2 diets<br>GFR significantly lower after low-protein/vegetarian diet compared with other 2 diets ( $P < 0.05$ ), microalbuminuric subjects only<br>UAFER (in microalbuminuric subjects only) significantly lower after chicken diet compared with other 2 diets, $P < 0.05$ |

Supplementary Table 1—Continued

| Ref. number | Author/year   | Study type/duration                                | Diabetes                     | n‡     | Comparison summary              | Intervention detail¶ dietary variable of interest for observational studies     | Significant results**                                                                                                                                                                                                                                                                                                       | Comments/study limitations#                                                                                                                                                                                                                                                                                                                                                   |
|-------------|---------------|----------------------------------------------------|------------------------------|--------|---------------------------------|---------------------------------------------------------------------------------|-----------------------------------------------------------------------------------------------------------------------------------------------------------------------------------------------------------------------------------------------------------------------------------------------------------------------------|-------------------------------------------------------------------------------------------------------------------------------------------------------------------------------------------------------------------------------------------------------------------------------------------------------------------------------------------------------------------------------|
| (82)        | Teixeira 2004 | RCT crossover/8 weeks each (4-week washout period) | Type 2 with macroalbuminuria | 14 men | Isolated soy protein vs. casein | 0.5 g/kg/day isolated soy protein powder vs. 0.5 g protein/kg/day casein powder | Glycemic measures: NS<br>HDL-C significantly increased 0.04 mmol/L after isolated soy protein ( $P = 0.0041$ ); decreased 0.03 mmol/L after casein ( $P = 0.0847$ ); effect of diet depended on baseline HDL-C ( $P = 0.0391$ for interaction) with larger differences between treatments in men with higher baseline HDL-C | 41% completion rate<br>No differences in BMI by study period (multiple regression)<br>Subjects added protein powders during the intervention periods instead of substituting for other proteins as instructed<br>UAC significantly decreased after isolated soy protein diet vs. casein ( $P < 0.001$ ) with larger differences between diets in men with higher baseline UAC |



Supplementary Table 1—Continued

| Ref. number | Author/year    | Study type/duration      | Diabetes                        | n‡        | Comparison summary         | Intervention detail¶ dietary variable of interest for observational studies                                                                                                                                                                                                                                                                                                               | Significant results*.*                                                                                                                                                                                                                                                                                                                                          | Comments/study limitations#                                                                                                                                                                                                                                                                                                                              |
|-------------|----------------|--------------------------|---------------------------------|-----------|----------------------------|-------------------------------------------------------------------------------------------------------------------------------------------------------------------------------------------------------------------------------------------------------------------------------------------------------------------------------------------------------------------------------------------|-----------------------------------------------------------------------------------------------------------------------------------------------------------------------------------------------------------------------------------------------------------------------------------------------------------------------------------------------------------------|----------------------------------------------------------------------------------------------------------------------------------------------------------------------------------------------------------------------------------------------------------------------------------------------------------------------------------------------------------|
| (83)        | Azadbakht 2008 | RCT parallel/<br>4 years | Type 2 with<br>macroalbuminuria | 41 adults | Soy protein<br>vs. control | Soy protein<br>group: 0.8 g<br>protein/kg/<br>day (35%<br>animal<br>protein, 35%<br>textured soy<br>protein, 30%<br>vegetable<br>protein)<br>prescribed.<br>Protein achieved<br>was 55–57 g/day<br>(± 17–23) vs.<br>control group:<br>0.8 g protein/<br>kg/day (70%<br>animal protein,<br>30% vegetable<br>protein)<br>prescribed.<br>Protein<br>achieved was<br>55–58 g/day<br>(± 17–23) | FBG mean<br>change in soy<br>group –18<br>mg/dL vs. +11<br>mg/dL in<br>control (P = 0.03)<br>TC mean change<br>in soy group<br>–23 mg/dL vs.<br>+10 mg/dL in<br>control (P = 0.01)<br>LDL-C mean change<br>in soy group –20<br>mg/dL vs. +6 mg/dL<br>in control (P = 0.01)<br>TG mean change in<br>soy group –24 mg/dL<br>vs. –5 mg/dL in<br>control (P = 0.01) | Weight controlled<br>in analyses<br>CRP mean change in<br>soy group –1.31<br>mg/dL vs. +0.33<br>mg/dL in control<br>(P = 0.02)<br>Significant<br>improvement in<br>proteinuria (–0.15<br>vs. 0.02 g/day, P =<br>0.001) soy vs.<br>control; however,<br>the significance<br>disappeared after<br>controlling for<br>changes in the blood<br>lipid profile |

Supplementary Table 1—Continued

| Ref. number | Author/year   | Study type/duration                                              | Diabetes | n‡                              | Comparison summary | Intervention detail¶ dietary variable of interest for observational studies                                                                            | Significant results**                                                                                                          | Comments/study limitations#                                                                                                                                                                                                                                                                                                                                         |
|-------------|---------------|------------------------------------------------------------------|----------|---------------------------------|--------------------|--------------------------------------------------------------------------------------------------------------------------------------------------------|--------------------------------------------------------------------------------------------------------------------------------|---------------------------------------------------------------------------------------------------------------------------------------------------------------------------------------------------------------------------------------------------------------------------------------------------------------------------------------------------------------------|
| (84)        | de Mello 2006 | RCT crossover, 3 arms/4 weeks each (4-week washout periods)      | Type 2   | 17 adults with macroalbuminuria | See Gross 2002     | See Gross, 2002. Usual diet: protein 17–25→ 21.9% vs. chicken diet: protein 17–25→21.2% vs. lower-protein/vegetarian diet: 0.5–0.8 g/kg/day→11.6% kcal | Glycemic measures: NS<br>IG significantly lower after chicken diet vs. usual diet or lower-protein/vegetarian diet (P = 0.012) | 43% completion rate (most excluded for reverting to microalbuminuria)<br>Weight not controlled; BMI and energy intake significantly lower after lower-protein/vegetarian diet than other 2 diets<br>No significant difference among groups for GFR<br>UAER significantly lower after chicken and lower-protein/vegetarian diets compared with usual diet, P < 0.001 |
| <b>Nuts</b> |               |                                                                  |          |                                 |                    |                                                                                                                                                        |                                                                                                                                |                                                                                                                                                                                                                                                                                                                                                                     |
| (85)        | Ma 2010       | RCT crossover, single blind/8 weeks each (8-week washout period) | Type 2   | 21 adults                       | Walnuts            | 56 g shelled, unroasted English walnuts/day isocalorically substituted for foods in an ad lib diet vs. ad lib diet                                     | Glycemic measures: NS<br>CVD risk measures: NS                                                                                 | Walnuts provided to subjects<br>Endothelial function (flow-mediated dilation) improved significantly after consumption of the walnut-enriched diet compared with the no walnut diet (2.2 ± 1.7% vs. 1.2 ± 1.6%, P = 0.04)                                                                                                                                           |

Supplementary Table 1—Continued

| Ref. number | Author/year  | Study type/duration           | Diabetes | n‡        | Comparison summary                           | Intervention detail¶ dietary variable of interest for observational studies                                                                                                                                                                                                                                                                       | Significant results**                                                                                                                                                                               | Comments/study limitations#                                                                                                                                                                                                            |
|-------------|--------------|-------------------------------|----------|-----------|----------------------------------------------|---------------------------------------------------------------------------------------------------------------------------------------------------------------------------------------------------------------------------------------------------------------------------------------------------------------------------------------------------|-----------------------------------------------------------------------------------------------------------------------------------------------------------------------------------------------------|----------------------------------------------------------------------------------------------------------------------------------------------------------------------------------------------------------------------------------------|
| (86)        | Tapsell 2004 | RCT parallel, 3 arms/6 months | Type 2   | 55 adults | Lower-fat diets vs. lower-fat diet + walnuts | Lower-fat diet: <30% fat, with portion controlled CHO counting meal plans and general dietary advice for reducing total and SFA vs. modified lower-fat diet: same as lower-fat diet but with more structured advice, meal plans based on energy requirements, and exchange lists for MUFA and PUFA vs. modified lower-fat diet + 30 g/day walnuts | Glycemic measures: NS<br>The walnut group achieved a significantly greater increase in HDL-C-to-total cholesterol ratio ( $P = 0.049$ ) and HDL-C ( $P = 0.046$ ) than the 2 other treatment groups | Walnuts (high in PUFA) provided to subjects<br>Gillen 2005 contains dietary variables and dietary goals and outcome information                                                                                                        |
| (87)        | Gillen 2005  | See Tapsell 2004              |          |           |                                              | Target ranges of <10% SFA, >7% PUFA, 2.22 g ALA, 0.65 g DHA, and omega-6:omega-3 ratio <10                                                                                                                                                                                                                                                        | Primary outcomes for this study were dietary variables and goals. See Tapsell 2004 for study details and clinical outcomes                                                                          | 100% of individuals in the walnut group reached desired intakes for SFAs ( $P < 0.01$ ), total PUFA ( $P < 0.001$ ), and omega-6:omega-3 ratio ( $P < 0.05$ ) at 3 and 6 months. Other groups were not successful in achieving targets |

Supplementary Table 1—Continued

| Ref. number | Author/year    | Study type/duration                                      | Diabetes | n‡        | Comparison summary                                                                                      | Intervention detail¶ dietary variable of interest for observational studies                                                                                                                                              | Significant results**                                                                                                                                                                                                                                       | Comments/study limitations#                                                                                                                                                                                                                                                                                                                                                                                                                                                                                                                                                                                    |
|-------------|----------------|----------------------------------------------------------|----------|-----------|---------------------------------------------------------------------------------------------------------|--------------------------------------------------------------------------------------------------------------------------------------------------------------------------------------------------------------------------|-------------------------------------------------------------------------------------------------------------------------------------------------------------------------------------------------------------------------------------------------------------|----------------------------------------------------------------------------------------------------------------------------------------------------------------------------------------------------------------------------------------------------------------------------------------------------------------------------------------------------------------------------------------------------------------------------------------------------------------------------------------------------------------------------------------------------------------------------------------------------------------|
| (30)        | Lovejoy 2002   | See "Carbohydrate amount: moderate to high carbohydrate" |          |           |                                                                                                         |                                                                                                                                                                                                                          |                                                                                                                                                                                                                                                             |                                                                                                                                                                                                                                                                                                                                                                                                                                                                                                                                                                                                                |
| (88)        | Mantzoros 2006 | Cross-sectional                                          | Type 2   | 987 women | Mediterranean-diet pattern determined from FFQ (current dietary data and 4 FFQs from the past 10 years) | Pattern assessed by 0–9 point scale: 1 point given if intake above median for fish, fruit, legumes, nuts, PUFA:SFA ratio, vegetables, whole grains; below median for red/processed meat and if alcohol intake 5–15 g/day | Glycemic measures: NS<br>HDL-C higher in highest tertile of adherence to Mediterranean diet as compared to lower 2 tertiles ( $P = 0.03$ )<br>TG lower in highest tertile of adherence to Mediterranean diet as compared to lower 2 tertiles ( $P = 0.04$ ) | Nurses' Health Study<br>Adiponectin:<br>a. highest tertile of adherence to Mediterranean diet over 10 years had adiponectin levels 25.9% higher than lowest tertile<br>controlling for age and total energy intake, $P < 0.01$ for trend across tertiles<br>b. significant independent effects by alcohol, nuts (12% higher levels in highest nut intake quintile compared to lowest) and whole grains (22% higher levels in highest intake quintile compared to lowest)<br>c. no effect for fruit, vegetables, fish, legumes, red/processed meats, protein, total carbohydrate, total fat, fiber, or PUFA/SFA |

Supplementary Table 1—Continued

| Ref. number         | Author/year      | Study type/duration                    | Diabetes | n‡          | Comparison summary                                             | Intervention detail¶ dietary variable of interest for observational studies | Significant results**                                                                                                                                                                                            | Comments/study limitations#                                                                                                                                                                                                                                                                                                  |
|---------------------|------------------|----------------------------------------|----------|-------------|----------------------------------------------------------------|-----------------------------------------------------------------------------|------------------------------------------------------------------------------------------------------------------------------------------------------------------------------------------------------------------|------------------------------------------------------------------------------------------------------------------------------------------------------------------------------------------------------------------------------------------------------------------------------------------------------------------------------|
| (89)                | Li 2009          | Prospective cohort                     | Type 2   | 6,309 women | Nut consumption from FFQ every 2–4 years between 1980 and 2002 | Dietary intake measure of nut (nuts or peanut butter) consumption           | Glycemic measures: not done<br>Increasing nut consumption was significantly associated with a more favorable plasma lipid profile, including lower LDL-C, non-HDL-C, TC, and apolipoprotein-B-100 concentrations | Nurses' Health Study<br>After adjustment for conventional CVD risk factors, consumption of at least 5-servings/week of nuts or peanut butter (serving size, 28-g [1 oz.] for nuts and 16-g [1 tablespoon] for peanut butter) was significantly associated with a lower risk of CVD (relative risk = 0.56; 95% CI: 0.36–0.89) |
| <b>Whole grains</b> |                  |                                        |          |             |                                                                |                                                                             |                                                                                                                                                                                                                  |                                                                                                                                                                                                                                                                                                                              |
| (48)                | Vuksan 2007      | See "Carbohydrate type: dietary fiber" |          |             |                                                                |                                                                             |                                                                                                                                                                                                                  |                                                                                                                                                                                                                                                                                                                              |
| (47)                | Lu 2004          | See "Carbohydrate type: dietary fiber" |          |             |                                                                |                                                                             |                                                                                                                                                                                                                  |                                                                                                                                                                                                                                                                                                                              |
| (54) (56)           | Qi 2006, He 2010 | See "Carbohydrate type: dietary fiber" |          |             |                                                                |                                                                             |                                                                                                                                                                                                                  |                                                                                                                                                                                                                                                                                                                              |
| (88)                | Mantzoros 2006   | See "Nuts"                             |          |             |                                                                |                                                                             |                                                                                                                                                                                                                  |                                                                                                                                                                                                                                                                                                                              |

Supplementary Table 1—Continued

| Ref. number    | Author/year | Study type/duration                                              | Diabetes | n‡        | Comparison summary                                       | Intervention detail¶ dietary variable of interest for observational studies                                                                                                                                                                                                                                                                                                                                    | Significant results**                                                                                                                                                                | Comments/study limitations#                |
|----------------|-------------|------------------------------------------------------------------|----------|-----------|----------------------------------------------------------|----------------------------------------------------------------------------------------------------------------------------------------------------------------------------------------------------------------------------------------------------------------------------------------------------------------------------------------------------------------------------------------------------------------|--------------------------------------------------------------------------------------------------------------------------------------------------------------------------------------|--------------------------------------------|
| <b>Legumes</b> |             |                                                                  |          |           |                                                          |                                                                                                                                                                                                                                                                                                                                                                                                                |                                                                                                                                                                                      |                                            |
| (91)           | Pipe 2009   | RCT crossover, double blind/57 days each (28-day washout period) | Type 2   | 29 adults | Soy protein isolate vs. milk protein isolate supplements | Subjects supplemented usual diet with either soy or milk protein isolates. Daily packets of supplements contained 200 kcal; 8–9 g CHO; 40 g protein from isolated soy protein or milk (casein and whey) protein; 1 g fat; 1–10 mg cholesterol; 1,400–1,600 mg calcium. The soy protein contained 88 mg isoflavones (65% genistein, 31% daidzein, 4% glycitein) and the milk protein contained 0 mg isoflavones | Glycemic measures: NA<br>LDL-C decreased with soy intervention from 2.95 to 2.78 mmol/L vs. milk (P = 0.04)<br>LDL-C:HDL-C ratio decreased with soy intervention vs. milk (P = 0.02) | Body weight did not differ between periods |
| (92)           | Gobert 2010 |                                                                  |          |           | See Pipe 2009 for study design details                   |                                                                                                                                                                                                                                                                                                                                                                                                                | Glycemic measures: NS<br>CVD risk measures: not done                                                                                                                                 |                                            |

Supplementary Table 1—Continued

| Ref. number | Author/year    | Study type/duration                                         | Diabetes | n‡        | Comparison summary                                                           | Intervention detail¶ dietary variable of interest for observational studies                                                                               | Significant results**                                                                                                                                                                            | Comments/study limitations#                                                                     |
|-------------|----------------|-------------------------------------------------------------|----------|-----------|------------------------------------------------------------------------------|-----------------------------------------------------------------------------------------------------------------------------------------------------------|--------------------------------------------------------------------------------------------------------------------------------------------------------------------------------------------------|-------------------------------------------------------------------------------------------------|
| (93)        | Hermansen 2001 | RCT crossover, double blind/6 weeks (3-week washout period) | Type 2   | 20 adults | Soy protein vs. casein                                                       | Soy protein (Abalon): 50 g isolated soy protein (>165 mg isoflavones) and 20 g cotyledon fiber vs. control: 50 g casein and 20 g cellulose                | Glycemic measures: NS<br>TC lower after Abalon than after control (5.11 vs. 5.45 mmol/L, <i>P</i> < 0.01)<br>LDL-C lower after Abalon than after control (3.01 vs. 3.33 mmol/L, <i>P</i> < 0.01) | Weight controlled                                                                               |
| (94)        | Kim 2005       | RCT parallel, double blind/13 weeks                         | Type 2   | 30 adults | Soybean-derived pinitol vs. lactose                                          | Soybean-derived pinitol: 600-mg oral dose, twice daily vs. lactose: twice daily                                                                           | Glycemic measures: NS<br>CVD risk measures: NS                                                                                                                                                   | No significant difference in BMI between groups at baseline, and no change over course of study |
| (50)        | Cho 2005       | See "Carbohydrate type: dietary fiber"                      |          |           |                                                                              |                                                                                                                                                           |                                                                                                                                                                                                  |                                                                                                 |
| (95)        | Fujita 2001    | RCT parallel, double blind/3 months                         | Type 2   | 36 adults | Fermented soybean-derived Touchi extract vs. steamed soybean-derived control | Both supplements incorporated into powdered tea. Subjects mixed tea with water and drank 1 cup with each meal. Each cup of tea contained 0.3 g supplement | A1C lower, Touchi vs. control (5.6 vs. 6.2%, <i>P</i> < 0.05)<br>FBG lower, Touchi vs. control (6.4 vs. 7.1 mmol/L, <i>P</i> < 0.05)<br>CVD risk measures: NS                                    | Weight uncontrolled, but no significant difference between groups                               |
| (60)        | Li 2005        | See "Fat amount"                                            |          |           |                                                                              |                                                                                                                                                           |                                                                                                                                                                                                  |                                                                                                 |
| (52)        | De Natale 2009 | See "Carbohydrate type: dietary fiber"                      |          |           |                                                                              |                                                                                                                                                           |                                                                                                                                                                                                  |                                                                                                 |

Supplementary Table 1—Continued

| Ref. number | Author/year    | Study type/duration                                               | Diabetes | n‡                      | Comparison summary            | Intervention detail¶ dietary variable of interest for observational studies                                                                                                 | Significant results**                                                                                                                                                                                                                                                                                       | Comments/study limitations#                                                                                                                                                                                                                                                              |
|-------------|----------------|-------------------------------------------------------------------|----------|-------------------------|-------------------------------|-----------------------------------------------------------------------------------------------------------------------------------------------------------------------------|-------------------------------------------------------------------------------------------------------------------------------------------------------------------------------------------------------------------------------------------------------------------------------------------------------------|------------------------------------------------------------------------------------------------------------------------------------------------------------------------------------------------------------------------------------------------------------------------------------------|
| (96)        | Jayagopal 2002 | RCT crossover, double blind/12 weeks each (2-week washout period) | Type 2   | 32 postmenopausal women | Soy phytoestrogen vs. placebo | 243-kcal packet containing 30 g isolated soy protein with 132 mg isoflavones (53% genistein, 37% daidzein, 10% glycitein) vs. placebo (microcrystalline cellulose), no kcal | A1C decreased, soy vs. placebo (−0.64 vs. +1.08%, <i>P</i> = 0.048)<br>Fasting serum insulin decreased, soy vs. placebo (−8.09 vs. +9.92%, <i>P</i> = 0.006)<br>TC decreased, soy vs. placebo (−4.07 vs. +2.83%, <i>P</i> = 0.004)<br>LDL-C decreased, soy vs. placebo (−7.09 vs. +5.35%, <i>P</i> = 0.001) | Weight uncontrolled, but no change in weight during study<br>Calorie difference between soy and placebo was a confounding factor as there was no assessment of diet or statistical control for calorie intake<br>HOMA-IR decreased, soy vs. placebo (−6.27 vs. +14.7%, <i>P</i> = 0.003) |
| (97)        | González 2007  | RCT crossover, double blind/12 weeks each (4-week washout period) | Type 2   | 26 postmenopausal women | Isoflavones vs. placebo       | Tablet with 132 mg isoflavones (53% genistein, 37% daidzein, 10% glycitein) vs. placebo tablet (cellulose)                                                                  | Glycemic measures: NS<br>CVD risk measures: NS                                                                                                                                                                                                                                                              | Weight not controlled                                                                                                                                                                                                                                                                    |



Supplementary Table 1—Continued

| Ref. number                  | Author/year    | Study type/duration                                              | Diabetes | n‡                      | Comparison summary                      | Intervention detail¶ dietary variable of interest for observational studies                                                                                                     | Significant results**                                                                                                                      | Comments/study limitations#                                                                                                                                                                                                                             |
|------------------------------|----------------|------------------------------------------------------------------|----------|-------------------------|-----------------------------------------|---------------------------------------------------------------------------------------------------------------------------------------------------------------------------------|--------------------------------------------------------------------------------------------------------------------------------------------|---------------------------------------------------------------------------------------------------------------------------------------------------------------------------------------------------------------------------------------------------------|
| (98)                         | Howes 2003     | RCT crossover, double blind/4 weeks each (4-week washout period) | Type 2   | 16 postmenopausal women | Isoflavones from red clover vs. control | 2 isoflavone tablets (25 mg formononetin, 2.5 mg biochanin, <1 mg genistein and daidzein per tablet) vs. control tablets                                                        | Glycemic measures: NS<br>CVD risk measures: NS                                                                                             | Weight not controlled, but no significant differences between periods<br>No description of content of control tablets (except no isoflavones)<br>Blood pressure and endothelial function were main outcomes studied                                     |
| <b>Vegetables and fruits</b> |                |                                                                  |          |                         |                                         |                                                                                                                                                                                 |                                                                                                                                            |                                                                                                                                                                                                                                                         |
| (99)                         | Sobenin 2008   | RCT parallel, double blind, 4 arms/4 weeks                       | Type 2   | 34 adults               | Garlic powder (AlliCor) vs. control     | Group 1: monotherapy with 300 mg of AlliCor twice a day or control with oral diabetes medications discontinued<br>Group 2: same except that oral diabetes medications continued | Serum fructosamine decreased significantly, AlliCor vs. control, both monotherapy and combined therapy (P < 0.05)<br>CVD risk measures: NS | Weight not controlled<br>Group 1: FBG ≤8 mmol/L; Group 2: FBG >8 mmol/L<br>Control is not described, so may not be a placebo<br>TG decreased significantly in AlliCor group, baseline to end of study, both monotherapy and combined therapy (P < 0.05) |
| (52)                         | De Natale 2009 | See "Carbohydrate type: dietary fiber"                           |          |                         |                                         |                                                                                                                                                                                 |                                                                                                                                            |                                                                                                                                                                                                                                                         |
| (88)                         | Mantzoros 2006 | See "Nuts"                                                       |          |                         |                                         |                                                                                                                                                                                 |                                                                                                                                            |                                                                                                                                                                                                                                                         |

Supplementary Table 1—Continued

| Ref. number                     | Author/year    | Study type/duration       | Diabetes | n‡                            | Comparison summary | Intervention detail¶ dietary variable of interest for observational studies                                         | Significant results**                                                                                                                                                                                   | Comments/study limitations#                                                                                                  |
|---------------------------------|----------------|---------------------------|----------|-------------------------------|--------------------|---------------------------------------------------------------------------------------------------------------------|---------------------------------------------------------------------------------------------------------------------------------------------------------------------------------------------------------|------------------------------------------------------------------------------------------------------------------------------|
| <b>Dairy</b>                    |                |                           |          |                               |                    |                                                                                                                     |                                                                                                                                                                                                         |                                                                                                                              |
| (100)                           | Mohamad 2009   | RCT parallel/16 weeks     | Type 1   | 54 young adults (17–20 years) | Camel milk         | Control group received usual care vs. usual care + 500 mL daily of camel milk                                       | Camel milk group vs. usual care group: A1C, FBG, and daily insulin dose significantly lower (7.16 vs. 9.59%, 99 vs. 227 mg/dL, 23 vs. 48 units, respectively), all $P < 0.001$<br>CVD risk measures: NS | Weight not controlled (BMI significantly higher in camel milk group vs. usual care group) (24.3 vs. 18.4 kg/m <sup>2</sup> ) |
| (101)                           | Shahar 2007    | Ancillary study of an RCT | Type 2   | 259 adults                    | Dairy calcium      | 3 isocaloric diets were assessed for calcium intake:<br>1. mixed GI CHO<br>2. lower GI<br>3. modified Mediterranean | Glycemic measures (A1C, FBG): NS<br>CVD risk measures: NS                                                                                                                                               | Study found no association between dairy calcium intake and other diabetes/CVD disease indexes                               |
| (91)                            | Pipe 2009      | See "Legumes"             |          |                               |                    |                                                                                                                     |                                                                                                                                                                                                         |                                                                                                                              |
| (92)                            | Gobert 2010    | See "Legumes"             |          |                               |                    |                                                                                                                     |                                                                                                                                                                                                         |                                                                                                                              |
| (93)                            | Hermansen 2001 | See "Legumes"             |          |                               |                    |                                                                                                                     |                                                                                                                                                                                                         |                                                                                                                              |
| (94)                            | Kim 2005       | See "Legumes"             |          |                               |                    |                                                                                                                     |                                                                                                                                                                                                         |                                                                                                                              |
| <b>Meats, poultry, and fish</b> |                |                           |          |                               |                    |                                                                                                                     |                                                                                                                                                                                                         |                                                                                                                              |
| (81)                            | Gross 2002     | See "Protein"             |          |                               |                    |                                                                                                                     |                                                                                                                                                                                                         |                                                                                                                              |

Supplementary Table 1—Continued

| Ref. number | Author/year   | Study type/duration | Diabetes | n‡          | Comparison summary | Intervention detail¶ dietary variable of interest for observational studies                                                                                                                                                                                                                                      | Significant results**                                      | Comments/study limitations#                                                                                                                                                                                                                                                                                                                                                |
|-------------|---------------|---------------------|----------|-------------|--------------------|------------------------------------------------------------------------------------------------------------------------------------------------------------------------------------------------------------------------------------------------------------------------------------------------------------------|------------------------------------------------------------|----------------------------------------------------------------------------------------------------------------------------------------------------------------------------------------------------------------------------------------------------------------------------------------------------------------------------------------------------------------------------|
| (84)        | de Mello 2006 | See "Protein"       |          |             |                    |                                                                                                                                                                                                                                                                                                                  |                                                            |                                                                                                                                                                                                                                                                                                                                                                            |
| (102)       | Qi 2007       | Prospective cohort  | Type 2   | 6,161 women | Red meat intake    | Red meat and heme iron (intake assessed as cumulative average from FFQs 1980, 1984, 1986, 1990, 1994, and 1998; FFQ asked about intake frequency and amount over past year; red meat defined as beef, pork, or lamb as main dish, beef as a sandwich or mixed dish, hamburger, hot dog, processed meat, or bacon | Glycemic measures: not done<br>CVD risk measures: not done | Nurses' Health Study<br>High heme iron and red meat intakes were associated with high intakes of saturated fat, low intakes of cereal fiber and vitamin C, and low dietary GL<br>After adjustment for age and BMI, high intakes of both heme iron and red meat were associated with a significantly increased risk of fatal CHD, coronary revascularization, and total CHD |

Supplementary Table 1—Continued

| Ref. number | Author/year   | Study type/duration | Diabetes                             | n‡                             | Comparison summary   | Intervention detail¶ dietary variable of interest for observational studies | Significant results,**                                     | Comments/study limitations#                                                                                                                                                                                                                                                                                                                                                                                        |
|-------------|---------------|---------------------|--------------------------------------|--------------------------------|----------------------|-----------------------------------------------------------------------------|------------------------------------------------------------|--------------------------------------------------------------------------------------------------------------------------------------------------------------------------------------------------------------------------------------------------------------------------------------------------------------------------------------------------------------------------------------------------------------------|
| (103)       | Möllsten 2001 | Case-control        | Type 1 with micro-/macro-albuminuria | 75 case and 225 control, youth | Fish fat and protein | Fish intake: FFQ for past 12 months                                         | Glycemic measures: not done<br>CVD risk measures: not done | High consumers of fish protein (mean intake 9.35 g fish protein/day, i.e., approximately 53 g fish/day) had lower odds ratios for microalbuminuria than individuals consuming less fish protein (mean 2.72 g/day)<br>When fish protein and fat were adjusted for each other, a high intake of fish protein but not of fish fat was still significantly associated with a decrease in the risk for microalbuminuria |

Supplementary Table 1—Continued

| Ref. number                | Author/year   | Study type/duration   | Diabetes | n‡         | Comparison summary                                                        | Intervention detail¶ dietary variable of interest for observational studies                                                                                                                                                                                                                                                                                                                                 | Significant results**                                                                                                                                                                                                      | Comments/study limitations#                                                                                                                                                                                                                                                |
|----------------------------|---------------|-----------------------|----------|------------|---------------------------------------------------------------------------|-------------------------------------------------------------------------------------------------------------------------------------------------------------------------------------------------------------------------------------------------------------------------------------------------------------------------------------------------------------------------------------------------------------|----------------------------------------------------------------------------------------------------------------------------------------------------------------------------------------------------------------------------|----------------------------------------------------------------------------------------------------------------------------------------------------------------------------------------------------------------------------------------------------------------------------|
| <b>Mediterranean diets</b> |               |                       |          |            |                                                                           |                                                                                                                                                                                                                                                                                                                                                                                                             |                                                                                                                                                                                                                            |                                                                                                                                                                                                                                                                            |
| (104)                      | Esposito 2009 | RCT parallel/ 4 years | Type 2   | 195 adults | Lower CHO diet vs. lower-fat diet (American Heart Association guidelines) | Lower-CHO Mediterranean-style diet: rich in vegetables, whole grains, with poultry and fish replacing red meats; goal <50% CHO and ≥30% fat; achieved 44.2% CHO, 10% SFA, 17.6% MUFA, 11.5% PUFA, 18% protein vs. Lower-fat diet: rich in whole grains, restricted in added fats, sweets, and high-fat snacks; goal <30% fat, <10% SFA; achieved: 51.8% CHO, 9.4% SFA, 12.4% MUFA, 7.6% PUFA, 17.9% protein | A1C and FBG significantly lower in lower-CHO Mediterranean diet vs. lower-fat diet, all 4 years HDL-C increased significantly and TG decreased significantly, lower-CHO Mediterranean diet vs. lower-fat diet, all 4 years | Weight- loss study Increase in fat in lower-CHO Mediterranean diet was from 30–50 g olive oil Primary outcome (time to antihyperglycemic therapy): after 4 years, 44% of patients in lower-CHO Mediterranean-diet group required treatment vs. 70% in lower-fat-diet group |

Supplementary Table 1—Continued

| Ref. number | Author/year     | Study type/duration      | Diabetes | n‡        | Comparison summary                                                                                                                                                  | Intervention detail¶ dietary variable of interest for observational studies                                                                                                                                                | Significant results*.*                         | Comments/study limitations#       |
|-------------|-----------------|--------------------------|----------|-----------|---------------------------------------------------------------------------------------------------------------------------------------------------------------------|----------------------------------------------------------------------------------------------------------------------------------------------------------------------------------------------------------------------------|------------------------------------------------|-----------------------------------|
| (105)       | Karantonis 2006 | RCT parallel/<br>4 weeks | Type 2   | 45 adults | Modified Mediterranean fast-food-type diet (using foods highest in platelet anti-aggregating activity) vs. control (traditional Greek Mediterranean fast-food diet) | Modified fast foods included macaroni and cheese, chicken fillet, pita burger, chef's salad, potato salad: 50% CHO, 38% fat (13% SFA, 17% MUFA, 8% PUFA), 16.5% protein, 22 g fiber (end-of-study values) vs. control diet | Glycemic measures: NS<br>CVD risk measures: NS | See comments in Antonopoulou 2006 |
|             |                 |                          |          |           |                                                                                                                                                                     | included fast foods such as roasted meat/fish with potatoes, beef and macaroni, carrot and cabbage salad: 53% CHO, 24% fat (12% SFA, 7% MUFA, 4% PUFA), 25% protein, 16 g fiber (end-of-study values)                      |                                                |                                   |

Supplementary Table 1—Continued

| Ref. number | Author/year        | Study type/duration  | Diabetes | n‡        | Comparison summary                                                                                                                             | Intervention detail¶ dietary variable of interest for observational studies                                                                                                                                                                                                                                                                                                  | Significant results*.*                              | Comments/study limitations#                                                                                                                                                                                                                                                        |
|-------------|--------------------|----------------------|----------|-----------|------------------------------------------------------------------------------------------------------------------------------------------------|------------------------------------------------------------------------------------------------------------------------------------------------------------------------------------------------------------------------------------------------------------------------------------------------------------------------------------------------------------------------------|-----------------------------------------------------|------------------------------------------------------------------------------------------------------------------------------------------------------------------------------------------------------------------------------------------------------------------------------------|
| (106)       | Antono-poulou 2006 | RCT parallel/4 weeks | Type 2   | 47 adults | Modified Greek Mediterranean diet using foods highest in platelet activating factor antagonists vs. control (typical Greek Mediterranean diet) | Modified diet included foods such as codfish soup, beef and fried potato, chicken and gumbo, and lettuce salad. Traditional diet included foods such as boiled chicken and rice, roasted fish and potato<br>Modified: 50% CHO, 38% fat (10% SFA, 21% MUFA, 4% PUFA), 15% protein (prescribed) vs. typical: 50–55% CHO, 20–25% fat (7% SFA, 12% MUFA, 2.4% PUFA), 25% protein | Glycemic measure (FBG): NS<br>CVD risk measures: NS | Foods were provided to all participants during the study, isocaloric to typical diets previous to study<br>Significant reduction in platelet-activating factor and adenosine-5 diphosphate-induced aggregation of platelets on the modified diet but no change on the typical diet |

Supplementary Table 1—Continued

| Ref. number | Author/year    | Study type/duration  | Diabetes | n‡        | Comparison summary                                                                                                                        | Intervention detail¶ dietary variable of interest for observational studies                                                                                                                                                                                                                                                | Significant results*#                          | Comments/study limitations#                                                                                                                                                                                                                                        |
|-------------|----------------|----------------------|----------|-----------|-------------------------------------------------------------------------------------------------------------------------------------------|----------------------------------------------------------------------------------------------------------------------------------------------------------------------------------------------------------------------------------------------------------------------------------------------------------------------------|------------------------------------------------|--------------------------------------------------------------------------------------------------------------------------------------------------------------------------------------------------------------------------------------------------------------------|
| (107)       | Aronis 2007    | RCT parallel/4 weeks | Type 2   | 35 adults | Fast-food Mediterranean–type diet (meals with most potent in vitro antioxidative activity) vs. control (traditional Greek fast-food diet) | Mediterranean fast foods included macaroni with cheese and tomato paste, hamburger, chef's salad, kidney bean salad: 53% CHO, 43% fat (15% SFA, 19% MUFA, 9% PUFA), 16% protein, 23 g fiber (end-of-study values) vs. control: 53% CHO, 24% fat (12% SFA, 7% MUFA, 4% PUFA), 25% protein, 16 g fiber (end-of-study values) | Glycemic measures: NS<br>CVD risk measures: NS | Foods were provided for both groups of subjects, isocaloric to typical diets previous to study<br>Diabetes oral agents were unchanged during the study<br>Plasma oxidation lag time increased significantly in fast-food group but did not change in control group |
| (52)        | De Natale 2009 | See "Fiber"          |          |           |                                                                                                                                           |                                                                                                                                                                                                                                                                                                                            |                                                |                                                                                                                                                                                                                                                                    |



Supplementary Table 1—Continued

| Ref. number | Author/year    | Study type/duration    | Diabetes | n‡                                                                       | Comparison summary                  | Intervention detail¶ dietary variable of interest for observational studies                                                                                                                                                                                                                                 | Significant results**                                                                                                                                                  | Comments/study limitations#                                                                                                                                                          |
|-------------|----------------|------------------------|----------|--------------------------------------------------------------------------|-------------------------------------|-------------------------------------------------------------------------------------------------------------------------------------------------------------------------------------------------------------------------------------------------------------------------------------------------------------|------------------------------------------------------------------------------------------------------------------------------------------------------------------------|--------------------------------------------------------------------------------------------------------------------------------------------------------------------------------------|
| (108)       | Ciccarone 2003 | Case-control           | Type 2   | 144 cases with PAD/288 controls (no macrovascular complications, adults) | Mediterranean diet scoring of a FFQ | Scoring: 1 point for vegetables ( $\geq 3$ times/week), fruits ( $\geq 7$ times/week), fish ( $\geq 1$ times/week), olive oil (1–2 times/day), alcohol ( $\leq 3$ glasses wine/day), eggs ( $\leq 2$ times/week), meat ( $\leq 2$ times/week), processed meat (0 times/week), cheese ( $\leq 2$ times/week) | Glycemic measure (A1C): NS<br>CVD risk measures: not done                                                                                                              | BMI controlled in multivariate analyses<br>In multivariate analysis, highest dietary score (11+ points) significantly and independently associated with 56% reduction in risk of PAD |
| (109)       | Marfella 2006  | RCT parallel/12 months | Type 2   | 115 adults, post-MI                                                      | Red wine vs. control                | Red wine, 4-oz. daily vs. control (no alcohol)<br>Both groups counseled on Mediterranean diet (mean intake 178 g CHO, 9 g SFA, 17 g MUFA, 8 g PUFA, 73 g protein, lower sodium, higher fiber)                                                                                                               | Glycemic measures: NS; however, fasting insulin and HOMA were higher in wine group vs. control ( $P < 0.05$ )<br>HDL-C higher in wine group vs. control ( $P < 0.05$ ) | Weight not controlled; however, weight loss not statistically different between groups                                                                                               |
| (88)        | Mantzoros 2006 | See "Nuts"             |          |                                                                          |                                     |                                                                                                                                                                                                                                                                                                             |                                                                                                                                                                        | Nurses' Health Study                                                                                                                                                                 |

Supplementary Table 1—Continued

| Ref. number             | Author/year          | Study type/duration                                      | Diabetes | n‡ | Comparison summary | Intervention detail¶ dietary variable of interest for observational studies | Significant results** | Comments/study limitations#                                                                                                                                                                                                                                                                 |
|-------------------------|----------------------|----------------------------------------------------------|----------|----|--------------------|-----------------------------------------------------------------------------|-----------------------|---------------------------------------------------------------------------------------------------------------------------------------------------------------------------------------------------------------------------------------------------------------------------------------------|
| <b>Vegetarian diets</b> |                      |                                                          |          |    |                    |                                                                             |                       |                                                                                                                                                                                                                                                                                             |
| (21)                    | Barnard 2009         | See "Carbohydrate amount: moderate to high carbohydrate" |          |    |                    |                                                                             |                       |                                                                                                                                                                                                                                                                                             |
| (110)                   | Turner-McGrievy 2008 | See Barnard 2009 for study details                       |          |    |                    |                                                                             |                       | Both vegan and traditional diets significantly improved intakes of energy, total fat, <i>trans</i> fat, cholesterol, and sodium but were below recommended intakes for vitamin D, E, calcium, and potassium<br>Vegan diet improved intake of fiber, folate, magnesium, and vitamins A, C, K |
| (81)                    | Gross 2002           | See "Protein"                                            |          |    |                    |                                                                             |                       |                                                                                                                                                                                                                                                                                             |
| (84)                    | de Mello 2006        | See "Protein"                                            |          |    |                    |                                                                             |                       |                                                                                                                                                                                                                                                                                             |

A1C, glycated hemoglobin; AER (or UAER), albumin excretion rate (or urinary albumin excretion rate); ALA, alpha-linolenic acid; AUC, area under the curve; CACTI, Coronary Artery Calcification in Type 1 Diabetes study; CGMS, continuous glucose monitoring system; CHD, coronary heart disease; CHO, carbohydrate; CRP, C-reactive protein; CVD, cardiovascular disease; DHA, docosahexaenoic acid; DPP, Diabetes Prevention Program; EASD, European Association for the Study of Diabetes; EPA, eicosapentaenoic acid; FFQ, food frequency questionnaire; GFR, glomerular filtration rate; GL, glycemic index; GL-1, glucagon-like peptide 1; HCHF, higher cholesterol/higher fiber; HDL-C, HDL cholesterol; HFHC, higher fat/higher carbohydrate; LpB:C, apoB-containing lipoprotein; MCHF, moderate carbohydrate/higher fiber; MCFLF, moderate carbohydrate/lower fiber; MI, myocardial infarction; MUJFA, monounsaturated fatty acid; NCEP, National Cholesterol Education Program; NHLBI, National Heart, Lung, and Blood Institute; NS, not significant; OGTT, oral glucose tolerance test; PAD, peripheral arterial disease; PG, plasma glucose; PPG, postprandial glucose; PUFA, polyunsaturated fatty acid; RCT, randomized controlled trial; TC, total cholesterol; TG, triglyceride; TNF, tumor necrosis factor; SFA, saturated fatty acid; UAER, urinary albumin excretion rate. ‡, number of subjects completing study. ¶, % CHO, fat, and/or protein refer to % kcal from CHO, fat, and/or protein; goal→achieved. \*\* , results are only presented for RCTs if the significance is between groups; for one-armed studies, if the significance is between beginning and end; glycemic measures, in general (A1C, FBG, PPG); CVD risk measures, in general (TC, LDL-C, HDL-C, TG). #, retention rate determined to be a limitation if <80%. \*, insignificant when accompanied by energy restriction. †, weight loss/weight maintenance.
